# Supplementary material
Source: publisher figshare collection journal article supplement (https://acs.figshare.com/ndownloader/files/4744543)
Supplement: Supplementary file 1 [file 4744543]

  
data_sad 
  
_audit_creation_method            SHELXL-97 
_chemical_name_systematic 
; 
 ? 
; 
_chemical_name_common             Ti(dmpm-mes)(NMe2)2 
_chemical_melting_point           ? 
_chemical_formula_moiety          ? 
_chemical_formula_sum 
 'C33 H44 N4 Ti' 
_chemical_formula_weight          544.62 
  
loop_ 
 _atom_type_symbol 
 _atom_type_description 
 _atom_type_scat_dispersion_real 
 _atom_type_scat_dispersion_imag 
 _atom_type_scat_source 
 'C'  'C'   0.0033   0.0016 
 'International Tables Vol C Tables 4.2.6.8 and 6.1.1.4' 
 'H'  'H'   0.0000   0.0000 
 'International Tables Vol C Tables 4.2.6.8 and 6.1.1.4' 
 'N'  'N'   0.0061   0.0033 
 'International Tables Vol C Tables 4.2.6.8 and 6.1.1.4' 
 'Ti'  'Ti'   0.2776   0.4457 
 'International Tables Vol C Tables 4.2.6.8 and 6.1.1.4' 
  
_symmetry_cell_setting            Monoclinic 
_symmetry_space_group_name_H-M    P2(1)/n 
  
loop_ 
 _symmetry_equiv_pos_as_xyz 
 'x, y, z' 
 '-x+1/2, y+1/2, -z+1/2' 
 '-x, -y, -z' 
 'x-1/2, -y-1/2, z-1/2' 
  
_cell_length_a                    8.840(4) 
_cell_length_b                    30.940(13) 
_cell_length_c                    11.113(5) 
_cell_angle_alpha                 90.00 
_cell_angle_beta                  98.779(8) 
_cell_angle_gamma                 90.00 
_cell_volume                      3004(2) 
_cell_formula_units_Z             4 
_cell_measurement_temperature     173(2) 
_cell_measurement_reflns_used     ? 
_cell_measurement_theta_min       ? 
_cell_measurement_theta_max       ? 
  
_exptl_crystal_description        plate 
_exptl_crystal_colour             orange 
_exptl_crystal_size_max           0.21 
_exptl_crystal_size_mid           0.23 
_exptl_crystal_size_min           0.87 
_exptl_crystal_density_meas       ? 
_exptl_crystal_density_diffrn     1.204 
_exptl_crystal_density_method     'not measured' 
_exptl_crystal_F_000              1168 
_exptl_absorpt_coefficient_mu     0.312 
_exptl_absorpt_correction_type    empirical 
_exptl_absorpt_correction_T_min   0.0851 
_exptl_absorpt_correction_T_max   0.2430 
_exptl_absorpt_process_details    ? 
  
_exptl_special_details 
; 
 ? 
; 
  
_diffrn_ambient_temperature       173(2) 
_diffrn_radiation_wavelength      0.71073 
_diffrn_radiation_type            MoK\a 
_diffrn_radiation_source          'fine-focus sealed tube' 
_diffrn_radiation_monochromator   graphite 
_diffrn_measurement_device_type   'CCD area detector' 
_diffrn_measurement_method        'phi and omega scans' 
_diffrn_detector_area_resol_mean  ? 
_diffrn_standards_number          ? 
_diffrn_standards_interval_count  ? 
_diffrn_standards_interval_time   ? 
_diffrn_standards_decay_%         ? 
_diffrn_reflns_number             25589 
_diffrn_reflns_av_R_equivalents   0.3089 
_diffrn_reflns_av_sigmaI/netI     0.3121 
_diffrn_reflns_limit_h_min        -9 
_diffrn_reflns_limit_h_max        9 
_diffrn_reflns_limit_k_min        -34 
_diffrn_reflns_limit_k_max        34 
_diffrn_reflns_limit_l_min        -12 
_diffrn_reflns_limit_l_max        12 
_diffrn_reflns_theta_min          1.32 
_diffrn_reflns_theta_max          23.32 
_reflns_number_total              4349 
_reflns_number_gt                 1440 
_reflns_threshold_expression      >2sigma(I) 
  
_computing_data_collection        'Bruker SMART' 
_computing_cell_refinement        'Bruker SMART' 
_computing_data_reduction         'Bruker SHELXTL' 
_computing_structure_solution     'SHELXS-97 (Sheldrick, 1990)' 
_computing_structure_refinement   'SHELXL-97 (Sheldrick, 1997)' 
_computing_molecular_graphics     'Bruker SHELXTL' 
_computing_publication_material   'Bruker SHELXTL' 
  
_refine_special_details 
; 
 Refinement of F^2^ against ALL reflections.  The weighted R-factor wR and 
 goodness of fit S are based on F^2^, conventional R-factors R are based 
 on F, with F set to zero for negative F^2^. The threshold expression of 
 F^2^ > 2sigma(F^2^) is used only for calculating R-factors(gt) etc. and is 
 not relevant to the choice of reflections for refinement.  R-factors based 
 on F^2^ are statistically about twice as large as those based on F, and R- 
 factors based on ALL data will be even larger. 
; 
  
_refine_ls_structure_factor_coef  Fsqd 
_refine_ls_matrix_type            full 
_refine_ls_weighting_scheme       calc 
_refine_ls_weighting_details 
 'calc w=1/[\s^2^(Fo^2^)+(0.1435P)^2^+0.0000P] where P=(Fo^2^+2Fc^2^)/3' 
_atom_sites_solution_primary      direct 
_atom_sites_solution_secondary    difmap 
_atom_sites_solution_hydrogens    geom 
_refine_ls_hydrogen_treatment     mixed 
_refine_ls_extinction_method      SHELXL 
_refine_ls_extinction_coef        0.029(4) 
_refine_ls_extinction_expression 
 'Fc^*^=kFc[1+0.001xFc^2^\l^3^/sin(2\q)]^-1/4^' 
_refine_ls_number_reflns          4349 
_refine_ls_number_parameters      339 
_refine_ls_number_restraints      0 
_refine_ls_R_factor_all           0.2849 
_refine_ls_R_factor_gt            0.0809 
_refine_ls_wR_factor_ref          0.3091 
_refine_ls_wR_factor_gt           0.1948 
_refine_ls_goodness_of_fit_ref    0.983 
_refine_ls_restrained_S_all       0.983 
_refine_ls_shift/su_max           0.006 
_refine_ls_shift/su_mean          0.000 
  
loop_ 
 _atom_site_label 
 _atom_site_type_symbol 
 _atom_site_fract_x 
 _atom_site_fract_y 
 _atom_site_fract_z 
 _atom_site_U_iso_or_equiv 
 _atom_site_adp_type 
 _atom_site_occupancy 
 _atom_site_symmetry_multiplicity 
 _atom_site_calc_flag 
 _atom_site_refinement_flags 
 _atom_site_disorder_assembly 
 _atom_site_disorder_group 
Ti Ti 0.3577(2) 0.63179(6) 0.30574(17) 0.0389(7) Uani 1 1 d . . . 
N1 N 0.2784(9) 0.5689(3) 0.3784(8) 0.041(2) Uani 1 1 d . . . 
N2 N 0.4403(8) 0.6571(3) 0.4728(7) 0.036(2) Uani 1 1 d . . . 
N3 N 0.1576(9) 0.6538(3) 0.2678(8) 0.045(2) Uani 1 1 d . . . 
N4 N 0.4716(9) 0.6554(3) 0.1917(7) 0.043(2) Uani 1 1 d . . . 
C1 C 0.4722(11) 0.5827(3) 0.5641(10) 0.043(3) Uani 1 1 d . . . 
C2 C 0.6427(12) 0.5708(4) 0.6068(11) 0.064(4) Uani 1 1 d . . . 
H2A H 0.7063 0.5867 0.5597 0.096 Uiso 1 1 calc R . . 
H2B H 0.6570 0.5404 0.5959 0.096 Uiso 1 1 calc R . . 
H2C H 0.6702 0.5780 0.6914 0.096 Uiso 1 1 calc R . . 
C3 C 0.3721(12) 0.5571(3) 0.6400(9) 0.052(3) Uani 1 1 d . . . 
H3A H 0.2665 0.5643 0.6141 0.078 Uiso 1 1 calc R . . 
H3B H 0.4001 0.5644 0.7244 0.078 Uiso 1 1 calc R . . 
H3C H 0.3870 0.5268 0.6289 0.078 Uiso 1 1 calc R . . 
C11 C 0.4305(12) 0.5713(3) 0.4306(10) 0.040(3) Uani 1 1 d . . . 
C12 C 0.5222(12) 0.5666(3) 0.3403(10) 0.041(3) Uani 1 1 d . . . 
H12A H 0.6343 0.5661 0.3524 0.050 Uiso 1 1 calc R . . 
C13 C 0.4241(12) 0.5604(3) 0.2288(10) 0.041(3) Uani 1 1 d . . . 
H13A H 0.4551 0.5543 0.1495 0.049 Uiso 1 1 calc R . . 
C14 C 0.2731(12) 0.5611(3) 0.2558(10) 0.037(3) Uani 1 1 d . . . 
C14A C 0.2249(12) 0.5850(4) -0.0131(10) 0.058(3) Uani 1 1 d . . . 
H14C H 0.3187 0.5869 0.0430 0.087 Uiso 1 1 calc R . . 
H14D H 0.1949 0.6134 -0.0428 0.087 Uiso 1 1 calc R . . 
H14E H 0.2398 0.5668 -0.0802 0.087 Uiso 1 1 calc R . . 
C14C C 0.0126(12) 0.5170(4) 0.3528(10) 0.065(4) Uani 1 1 d . . . 
H14F H -0.0845 0.5056 0.3665 0.097 Uiso 1 1 calc R . . 
H14G H 0.0431 0.5399 0.4095 0.097 Uiso 1 1 calc R . . 
H14H H 0.0879 0.4944 0.3639 0.097 Uiso 1 1 calc R . . 
C14B C -0.3202(12) 0.5399(3) -0.0484(10) 0.054(3) Uiso 1 1 d . . . 
H14I H -0.3150 0.5507 -0.1287 0.081 Uiso 1 1 calc R . . 
H14J H -0.3940 0.5564 -0.0126 0.081 Uiso 1 1 calc R . . 
H14K H -0.3503 0.5101 -0.0533 0.081 Uiso 1 1 calc R . . 
C21 C 0.4502(10) 0.6312(4) 0.5772(10) 0.039(3) Uani 1 1 d . . . 
C22 C 0.4494(12) 0.6558(4) 0.6790(10) 0.051(3) Uani 1 1 d . . . 
H22A H 0.4508 0.6459 0.7582 0.061 Uiso 1 1 calc R . . 
C23 C 0.4458(12) 0.6989(4) 0.6403(11) 0.051(3) Uani 1 1 d . . . 
H23A H 0.4474 0.7231 0.6902 0.061 Uiso 1 1 calc R . . 
C24C C 0.1758(12) 0.7564(4) 0.4367(11) 0.062(4) Uani 1 1 d . . . 
H24A H 0.1041 0.7783 0.4039 0.093 Uiso 1 1 calc R . . 
H24B H 0.1859 0.7566 0.5240 0.093 Uiso 1 1 calc R . . 
H24C H 0.1397 0.7286 0.4066 0.093 Uiso 1 1 calc R . . 
C24 C 0.4398(11) 0.6994(3) 0.5175(10) 0.038(3) Uani 1 1 d . . . 
C24A C 0.7329(11) 0.7180(3) 0.4429(10) 0.056(3) Uani 1 1 d . . . 
H24F H 0.8201 0.7286 0.4100 0.084 Uiso 1 1 calc R . . 
H24G H 0.7103 0.6890 0.4146 0.084 Uiso 1 1 calc R . . 
H24H H 0.7547 0.7181 0.5302 0.084 Uiso 1 1 calc R . . 
C24B C 0.5080(13) 0.8466(4) 0.2013(10) 0.063(3) Uani 1 1 d . . . 
H24I H 0.4123 0.8616 0.1824 0.094 Uiso 1 1 calc R . . 
H24J H 0.5383 0.8358 0.1276 0.094 Uiso 1 1 calc R . . 
H24K H 0.5847 0.8661 0.2403 0.094 Uiso 1 1 calc R . . 
C31 C 0.0545(12) 0.6460(4) 0.3587(11) 0.062(4) Uani 1 1 d . . . 
H31A H -0.0439 0.6585 0.3304 0.094 Uiso 1 1 calc R . . 
H31B H 0.0971 0.6590 0.4348 0.094 Uiso 1 1 calc R . . 
H31C H 0.0435 0.6154 0.3698 0.094 Uiso 1 1 calc R . . 
C32 C 0.0665(13) 0.6692(4) 0.1523(10) 0.065(4) Uani 1 1 d . . . 
H32A H -0.0329 0.6782 0.1673 0.098 Uiso 1 1 calc R . . 
H32B H 0.0556 0.6462 0.0937 0.098 Uiso 1 1 calc R . . 
H32C H 0.1179 0.6931 0.1214 0.098 Uiso 1 1 calc R . . 
C41 C 0.4253(12) 0.6987(3) 0.1445(10) 0.056(3) Uani 1 1 d . . . 
H41A H 0.4904 0.7076 0.0874 0.084 Uiso 1 1 calc R . . 
H41B H 0.4343 0.7189 0.2108 0.084 Uiso 1 1 calc R . . 
H41C H 0.3210 0.6978 0.1046 0.084 Uiso 1 1 calc R . . 
C42 C 0.6024(12) 0.6419(4) 0.1346(10) 0.061(4) Uani 1 1 d . . . 
H42A H 0.6257 0.6640 0.0796 0.092 Uiso 1 1 calc R . . 
H42B H 0.5778 0.6155 0.0903 0.092 Uiso 1 1 calc R . . 
H42C H 0.6894 0.6373 0.1962 0.092 Uiso 1 1 calc R . . 
C141 C 0.1241(11) 0.5536(3) 0.1739(10) 0.038(3) Uani 1 1 d . . . 
C142 C 0.0999(12) 0.5660(3) 0.0516(10) 0.041(3) Uani 1 1 d . . . 
C143 C -0.0433(13) 0.5611(3) -0.0185(10) 0.048(3) Uani 1 1 d . . . 
H14B H -0.0573 0.5696 -0.0997 0.057 Uiso 1 1 calc R . . 
C144 C -0.1648(12) 0.5441(4) 0.0293(10) 0.044(3) Uani 1 1 d . . . 
C145 C -0.1421(12) 0.5304(3) 0.1502(10) 0.047(3) Uani 1 1 d . . . 
H14A H -0.2237 0.5183 0.1822 0.056 Uiso 1 1 calc R . . 
C146 C -0.0013(12) 0.5342(3) 0.2242(10) 0.044(3) Uani 1 1 d . . . 
C241 C 0.4533(12) 0.7369(3) 0.4376(9) 0.036(3) Uani 1 1 d . . . 
C242 C 0.5977(12) 0.7465(3) 0.4019(10) 0.044(3) Uani 1 1 d . . . 
C243 C 0.6103(12) 0.7819(4) 0.3290(9) 0.047(3) Uani 1 1 d . . . 
H24E H 0.7054 0.7881 0.3070 0.056 Uiso 1 1 calc R . . 
C244 C 0.4897(13) 0.8086(3) 0.2873(10) 0.046(3) Uani 1 1 d . . . 
C245 C 0.3508(12) 0.8008(3) 0.3253(10) 0.047(3) Uani 1 1 d . . . 
H24D H 0.2695 0.8195 0.3013 0.057 Uiso 1 1 calc R . . 
C246 C 0.3290(11) 0.7654(3) 0.3987(9) 0.039(3) Uani 1 1 d . . . 
  
loop_ 
 _atom_site_aniso_label 
 _atom_site_aniso_U_11 
 _atom_site_aniso_U_22 
 _atom_site_aniso_U_33 
 _atom_site_aniso_U_23 
 _atom_site_aniso_U_13 
 _atom_site_aniso_U_12 
Ti 0.0318(12) 0.0411(13) 0.0430(13) -0.0009(10) 0.0026(9) 0.0012(10) 
N1 0.029(6) 0.053(6) 0.041(6) -0.005(5) 0.005(5) -0.004(4) 
N2 0.022(5) 0.045(6) 0.039(6) -0.003(5) -0.002(4) -0.003(4) 
N3 0.036(6) 0.045(5) 0.050(6) 0.004(5) -0.003(5) 0.008(5) 
N4 0.039(6) 0.049(6) 0.043(6) 0.003(5) 0.011(5) 0.001(5) 
C1 0.032(7) 0.049(8) 0.048(8) 0.012(6) 0.004(6) 0.005(6) 
C2 0.047(8) 0.071(9) 0.066(9) -0.001(7) -0.016(7) 0.007(7) 
C3 0.065(8) 0.047(7) 0.040(7) 0.006(6) -0.009(6) -0.005(6) 
C11 0.037(7) 0.039(7) 0.043(7) -0.002(6) -0.002(6) 0.000(5) 
C12 0.033(7) 0.037(7) 0.051(8) 0.001(6) -0.002(6) 0.007(5) 
C13 0.039(7) 0.040(7) 0.044(7) 0.000(6) 0.005(6) 0.009(6) 
C14 0.037(7) 0.035(7) 0.039(7) 0.000(5) 0.003(6) -0.004(5) 
C14A 0.050(8) 0.070(9) 0.053(8) 0.003(6) 0.007(6) -0.016(7) 
C14C 0.046(8) 0.081(9) 0.069(9) 0.019(7) 0.011(7) -0.016(7) 
C21 0.029(6) 0.050(7) 0.034(7) 0.006(7) -0.005(5) -0.002(6) 
C22 0.053(8) 0.056(8) 0.044(8) 0.001(7) 0.007(6) -0.008(7) 
C23 0.051(8) 0.055(9) 0.046(8) -0.011(6) 0.007(6) -0.005(6) 
C24C 0.045(8) 0.064(9) 0.081(10) -0.008(7) 0.022(7) 0.010(7) 
C24 0.030(6) 0.040(7) 0.043(8) -0.008(6) 0.004(5) 0.000(5) 
C24A 0.029(7) 0.054(8) 0.084(9) 0.006(7) 0.006(6) 0.003(6) 
C24B 0.060(9) 0.064(8) 0.062(9) 0.007(7) 0.001(7) -0.013(7) 
C31 0.047(8) 0.058(8) 0.087(10) -0.005(7) 0.026(7) 0.001(6) 
C32 0.049(8) 0.074(10) 0.065(9) -0.004(7) -0.014(7) 0.017(7) 
C41 0.057(8) 0.057(8) 0.054(8) 0.003(6) 0.009(6) -0.002(7) 
C42 0.053(8) 0.061(9) 0.072(9) 0.006(7) 0.019(7) 0.000(6) 
C141 0.028(7) 0.039(7) 0.043(8) -0.007(6) -0.003(6) 0.001(5) 
C142 0.034(7) 0.049(7) 0.042(8) -0.008(6) 0.010(6) -0.015(6) 
C143 0.044(8) 0.053(8) 0.045(8) 0.001(6) 0.003(6) 0.000(6) 
C144 0.028(7) 0.065(8) 0.036(7) -0.003(6) -0.008(6) 0.009(6) 
C145 0.033(7) 0.052(8) 0.055(9) -0.007(6) 0.004(6) 0.003(6) 
C146 0.043(8) 0.048(7) 0.041(7) 0.005(6) 0.007(6) -0.004(6) 
C241 0.035(7) 0.032(6) 0.040(7) -0.007(5) 0.003(6) -0.003(5) 
C242 0.035(7) 0.038(7) 0.060(8) 0.004(6) 0.012(6) 0.006(6) 
C243 0.038(7) 0.052(8) 0.051(8) -0.010(6) 0.004(6) -0.005(6) 
C244 0.043(8) 0.044(8) 0.049(8) -0.005(6) -0.003(6) -0.001(6) 
C245 0.030(7) 0.040(7) 0.068(9) -0.006(6) -0.005(6) 0.006(6) 
C246 0.029(7) 0.040(7) 0.048(7) -0.006(6) 0.007(6) -0.002(6) 
  
_geom_special_details 
; 
 All esds (except the esd in the dihedral angle between two l.s. planes) 
 are estimated using the full covariance matrix.  The cell esds are taken 
 into account individually in the estimation of esds in distances, angles 
 and torsion angles; correlations between esds in cell parameters are only 
 used when they are defined by crystal symmetry.  An approximate (isotropic) 
 treatment of cell esds is used for estimating esds involving l.s. planes. 
; 
  
loop_ 
 _geom_bond_atom_site_label_1 
 _geom_bond_atom_site_label_2 
 _geom_bond_distance 
 _geom_bond_site_symmetry_2 
 _geom_bond_publ_flag 
Ti N3 1.881(8) . ? 
Ti N4 1.882(8) . ? 
Ti N2 2.044(8) . ? 
Ti N1 2.258(8) . ? 
Ti C14 2.349(10) . ? 
Ti C11 2.360(10) . ? 
Ti C13 2.471(10) . ? 
Ti C12 2.481(10) . ? 
N1 C14 1.377(12) . ? 
N1 C11 1.383(12) . ? 
N2 C21 1.402(12) . ? 
N2 C24 1.401(11) . ? 
N3 C31 1.480(12) . ? 
N3 C32 1.486(12) . ? 
N4 C42 1.462(12) . ? 
N4 C41 1.475(12) . ? 
C1 C11 1.515(14) . ? 
C1 C21 1.522(14) . ? 
C1 C3 1.532(13) . ? 
C1 C2 1.554(13) . ? 
C11 C12 1.390(13) . ? 
C12 C13 1.413(13) . ? 
C13 C14 1.412(13) . ? 
C14 C141 1.500(13) . ? 
C14A C142 1.526(13) . ? 
C14C C146 1.513(13) . ? 
C14B C144 1.513(13) . ? 
C21 C22 1.365(13) . ? 
C22 C23 1.401(14) . ? 
C23 C24 1.357(13) . ? 
C24C C246 1.505(13) . ? 
C24 C241 1.477(13) . ? 
C24A C242 1.498(13) . ? 
C24B C244 1.538(14) . ? 
C141 C142 1.397(13) . ? 
C141 C146 1.445(13) . ? 
C142 C143 1.390(14) . ? 
C143 C144 1.374(13) . ? 
C144 C145 1.393(13) . ? 
C145 C146 1.388(13) . ? 
C241 C246 1.423(13) . ? 
C241 C242 1.425(13) . ? 
C242 C243 1.378(14) . ? 
C243 C244 1.372(14) . ? 
C244 C245 1.380(14) . ? 
C245 C246 1.396(13) . ? 
  
loop_ 
 _geom_angle_atom_site_label_1 
 _geom_angle_atom_site_label_2 
 _geom_angle_atom_site_label_3 
 _geom_angle 
 _geom_angle_site_symmetry_1 
 _geom_angle_site_symmetry_3 
 _geom_angle_publ_flag 
N3 Ti N4 106.9(4) . . ? 
N3 Ti N2 105.0(3) . . ? 
N4 Ti N2 108.0(4) . . ? 
N3 Ti N1 93.4(3) . . ? 
N4 Ti N1 143.3(3) . . ? 
N2 Ti N1 95.3(3) . . ? 
N3 Ti C14 91.7(4) . . ? 
N4 Ti C14 112.7(4) . . ? 
N2 Ti C14 128.9(4) . . ? 
N1 Ti C14 34.7(3) . . ? 
N3 Ti C11 125.5(4) . . ? 
N4 Ti C11 125.2(4) . . ? 
N2 Ti C11 75.0(4) . . ? 
N1 Ti C11 34.8(3) . . ? 
C14 Ti C11 56.6(4) . . ? 
N3 Ti C13 120.7(4) . . ? 
N4 Ti C13 86.2(4) . . ? 
N2 Ti C13 125.8(4) . . ? 
N1 Ti C13 57.1(3) . . ? 
C14 Ti C13 34.0(3) . . ? 
C11 Ti C13 55.7(4) . . ? 
N3 Ti C12 146.8(4) . . ? 
N4 Ti C12 93.3(4) . . ? 
N2 Ti C12 92.9(4) . . ? 
N1 Ti C12 56.7(3) . . ? 
C14 Ti C12 55.8(3) . . ? 
C11 Ti C12 33.3(3) . . ? 
C13 Ti C12 33.2(3) . . ? 
C14 N1 C11 108.0(8) . . ? 
C14 N1 Ti 76.3(5) . . ? 
C11 N1 Ti 76.6(5) . . ? 
C21 N2 C24 104.1(8) . . ? 
C21 N2 Ti 120.1(7) . . ? 
C24 N2 Ti 131.3(7) . . ? 
C31 N3 C32 109.4(8) . . ? 
C31 N3 Ti 116.4(7) . . ? 
C32 N3 Ti 132.6(7) . . ? 
C42 N4 C41 107.5(8) . . ? 
C42 N4 Ti 136.2(7) . . ? 
C41 N4 Ti 116.3(6) . . ? 
C11 C1 C21 107.9(8) . . ? 
C11 C1 C3 110.1(9) . . ? 
C21 C1 C3 111.3(8) . . ? 
C11 C1 C2 108.9(9) . . ? 
C21 C1 C2 109.6(9) . . ? 
C3 C1 C2 108.9(9) . . ? 
N1 C11 C12 109.1(10) . . ? 
N1 C11 C1 119.9(9) . . ? 
C12 C11 C1 130.5(10) . . ? 
N1 C11 Ti 68.6(5) . . ? 
C12 C11 Ti 78.2(6) . . ? 
C1 C11 Ti 113.3(7) . . ? 
C11 C12 C13 107.5(9) . . ? 
C11 C12 Ti 68.6(6) . . ? 
C13 C12 Ti 73.1(6) . . ? 
C14 C13 C12 106.5(9) . . ? 
C14 C13 Ti 68.3(5) . . ? 
C12 C13 Ti 73.8(6) . . ? 
N1 C14 C13 108.8(9) . . ? 
N1 C14 C141 121.4(9) . . ? 
C13 C14 C141 129.7(10) . . ? 
N1 C14 Ti 69.0(5) . . ? 
C13 C14 Ti 77.8(6) . . ? 
C141 C14 Ti 120.4(6) . . ? 
C22 C21 N2 111.1(10) . . ? 
C22 C21 C1 130.2(10) . . ? 
N2 C21 C1 118.5(9) . . ? 
C21 C22 C23 106.2(10) . . ? 
C24 C23 C22 108.4(10) . . ? 
C23 C24 N2 110.1(9) . . ? 
C23 C24 C241 128.2(10) . . ? 
N2 C24 C241 121.1(9) . . ? 
C142 C141 C146 118.5(9) . . ? 
C142 C141 C14 122.5(9) . . ? 
C146 C141 C14 119.0(10) . . ? 
C143 C142 C141 120.5(9) . . ? 
C143 C142 C14A 116.2(10) . . ? 
C141 C142 C14A 123.4(10) . . ? 
C144 C143 C142 121.6(10) . . ? 
C143 C144 C145 118.9(10) . . ? 
C143 C144 C14B 120.4(10) . . ? 
C145 C144 C14B 120.6(10) . . ? 
C146 C145 C144 121.9(10) . . ? 
C145 C146 C141 118.6(10) . . ? 
C145 C146 C14C 117.7(10) . . ? 
C141 C146 C14C 123.7(10) . . ? 
C246 C241 C242 118.1(9) . . ? 
C246 C241 C24 122.6(9) . . ? 
C242 C241 C24 119.3(9) . . ? 
C243 C242 C241 119.0(10) . . ? 
C243 C242 C24A 121.0(10) . . ? 
C241 C242 C24A 120.0(9) . . ? 
C244 C243 C242 123.3(10) . . ? 
C243 C244 C245 118.2(10) . . ? 
C243 C244 C24B 121.3(10) . . ? 
C245 C244 C24B 120.5(10) . . ? 
C244 C245 C246 121.7(10) . . ? 
C245 C246 C241 119.6(9) . . ? 
C245 C246 C24C 121.3(10) . . ? 
C241 C246 C24C 119.1(10) . . ? 
  
_diffrn_measured_fraction_theta_max    0.997 
_diffrn_reflns_theta_full              23.32 
_diffrn_measured_fraction_theta_full   0.997 
_refine_diff_density_max    0.479 
_refine_diff_density_min   -0.408 
_refine_diff_density_rms    0.099 
  
#===END


data_06009 
  
_audit_creation_method            SHELXL-97 
_chemical_name_systematic 
; 
 ? 
; 
_chemical_name_common             Ti(NMe2)2(2-(3,5-CF3C6H3)pyrrolyl)2 
_chemical_melting_point           ? 
_chemical_formula_moiety          ? 
_chemical_formula_sum 
 'C28 H24 F12 N4 Ti' 
_chemical_formula_weight          692.41 
  
loop_ 
 _atom_type_symbol 
 _atom_type_description 
 _atom_type_scat_dispersion_real 
 _atom_type_scat_dispersion_imag 
 _atom_type_scat_source 
 'C'  'C'   0.0033   0.0016 
 'International Tables Vol C Tables 4.2.6.8 and 6.1.1.4' 
 'H'  'H'   0.0000   0.0000 
 'International Tables Vol C Tables 4.2.6.8 and 6.1.1.4' 
 'N'  'N'   0.0061   0.0033 
 'International Tables Vol C Tables 4.2.6.8 and 6.1.1.4' 
 'F'  'F'   0.0171   0.0103 
 'International Tables Vol C Tables 4.2.6.8 and 6.1.1.4' 
 'Ti'  'Ti'   0.2776   0.4457 
 'International Tables Vol C Tables 4.2.6.8 and 6.1.1.4' 
  
_symmetry_cell_setting            Monoclinic 
_symmetry_space_group_name_H-M    P2(1)/c 
  
loop_ 
 _symmetry_equiv_pos_as_xyz 
 'x, y, z' 
 '-x, y+1/2, -z+1/2' 
 '-x, -y, -z' 
 'x, -y-1/2, z-1/2' 
  
_cell_length_a                    19.534(3) 
_cell_length_b                    8.1035(12) 
_cell_length_c                    19.178(3) 
_cell_angle_alpha                 90.00 
_cell_angle_beta                  105.277(3) 
_cell_angle_gamma                 90.00 
_cell_volume                      2928.5(7) 
_cell_formula_units_Z             4 
_cell_measurement_temperature     446(2) 
_cell_measurement_reflns_used     ? 
_cell_measurement_theta_min       ? 
_cell_measurement_theta_max       ? 
  
_exptl_crystal_description        plate 
_exptl_crystal_colour             yellow 
_exptl_crystal_size_max           0.17 
_exptl_crystal_size_mid           0.24 
_exptl_crystal_size_min           0.31 
_exptl_crystal_density_meas       ? 
_exptl_crystal_density_diffrn     1.570 
_exptl_crystal_density_method     'not measured' 
_exptl_crystal_F_000              1400 
_exptl_absorpt_coefficient_mu     0.395 
_exptl_absorpt_correction_type    empirical 
_exptl_absorpt_correction_T_min   0.6246 
_exptl_absorpt_correction_T_max   0.8671 
_exptl_absorpt_process_details    ? 
  
_exptl_special_details 
; 
 ? 
; 
  
_diffrn_ambient_temperature       446(2) 
_diffrn_radiation_wavelength      0.71073 
_diffrn_radiation_type            MoK\a 
_diffrn_radiation_source          'fine-focus sealed tube' 
_diffrn_radiation_monochromator   graphite 
_diffrn_measurement_device_type   'CCD area detector' 
_diffrn_measurement_method        'phi and omega scans' 
_diffrn_detector_area_resol_mean  ? 
_diffrn_standards_number          ? 
_diffrn_standards_interval_count  ? 
_diffrn_standards_interval_time   ? 
_diffrn_standards_decay_%         ? 
_diffrn_reflns_number             24219 
_diffrn_reflns_av_R_equivalents   0.1121 
_diffrn_reflns_av_sigmaI/netI     0.0780 
_diffrn_reflns_limit_h_min        -21 
_diffrn_reflns_limit_h_max        21 
_diffrn_reflns_limit_k_min        -9 
_diffrn_reflns_limit_k_max        9 
_diffrn_reflns_limit_l_min        -21 
_diffrn_reflns_limit_l_max        21 
_diffrn_reflns_theta_min          2.16 
_diffrn_reflns_theta_max          23.30 
_reflns_number_total              4215 
_reflns_number_gt                 2697 
_reflns_threshold_expression      >2sigma(I) 
  
_computing_data_collection        'Bruker SMART' 
_computing_cell_refinement        'Bruker SMART' 
_computing_data_reduction         'Bruker SHELXTL' 
_computing_structure_solution     'SHELXS-97 (Sheldrick, 1990)' 
_computing_structure_refinement   'SHELXL-97 (Sheldrick, 1997)' 
_computing_molecular_graphics     'Bruker SHELXTL' 
_computing_publication_material   'Bruker SHELXTL' 
  
_refine_special_details 
; 
 Refinement of F^2^ against ALL reflections.  The weighted R-factor wR and 
 goodness of fit S are based on F^2^, conventional R-factors R are based 
 on F, with F set to zero for negative F^2^. The threshold expression of 
 F^2^ > 2sigma(F^2^) is used only for calculating R-factors(gt) etc. and is 
 not relevant to the choice of reflections for refinement.  R-factors based 
 on F^2^ are statistically about twice as large as those based on F, and R- 
 factors based on ALL data will be even larger. 
; 
  
_refine_ls_structure_factor_coef  Fsqd 
_refine_ls_matrix_type            full 
_refine_ls_weighting_scheme       calc 
_refine_ls_weighting_details 
 'calc w=1/[\s^2^(Fo^2^)+(0.0747P)^2^+2.1134P] where P=(Fo^2^+2Fc^2^)/3' 
_atom_sites_solution_primary      direct 
_atom_sites_solution_secondary    difmap 
_atom_sites_solution_hydrogens    geom 
_refine_ls_hydrogen_treatment     mixed 
_refine_ls_extinction_method      SHELXL 
_refine_ls_extinction_coef        0.0025(6) 
_refine_ls_extinction_expression 
 'Fc^*^=kFc[1+0.001xFc^2^\l^3^/sin(2\q)]^-1/4^' 
_refine_ls_number_reflns          4215 
_refine_ls_number_parameters      407 
_refine_ls_number_restraints      0 
_refine_ls_R_factor_all           0.0919 
_refine_ls_R_factor_gt            0.0512 
_refine_ls_wR_factor_ref          0.1534 
_refine_ls_wR_factor_gt           0.1328 
_refine_ls_goodness_of_fit_ref    1.030 
_refine_ls_restrained_S_all       1.030 
_refine_ls_shift/su_max           0.000 
_refine_ls_shift/su_mean          0.000 
  
loop_ 
 _atom_site_label 
 _atom_site_type_symbol 
 _atom_site_fract_x 
 _atom_site_fract_y 
 _atom_site_fract_z 
 _atom_site_U_iso_or_equiv 
 _atom_site_adp_type 
 _atom_site_occupancy 
 _atom_site_symmetry_multiplicity 
 _atom_site_calc_flag 
 _atom_site_refinement_flags 
 _atom_site_disorder_assembly 
 _atom_site_disorder_group 
Ti Ti 0.22628(4) 0.89884(10) 0.35630(4) 0.0258(3) Uani 1 1 d . . . 
N1 N 0.29377(19) 0.8181(5) 0.4465(2) 0.0285(9) Uani 1 1 d . . . 
N2 N 0.13435(19) 0.7772(5) 0.3454(2) 0.0273(9) Uani 1 1 d . . . 
N3 N 0.2651(2) 0.8495(5) 0.2803(2) 0.0310(10) Uani 1 1 d . . . 
N4 N 0.20728(19) 1.1224(4) 0.35508(19) 0.0252(9) Uani 1 1 d . . . 
F131 F 0.62869(17) 0.7823(5) 0.44606(19) 0.0751(12) Uani 1 1 d . . . 
F132 F 0.57624(18) 0.6883(5) 0.3426(2) 0.0729(11) Uani 1 1 d . . . 
F133 F 0.62561(17) 0.9232(4) 0.3511(2) 0.0691(10) Uani 1 1 d . . . 
F151 F 0.46429(17) 1.3737(4) 0.31149(19) 0.0615(10) Uani 1 1 d . . . 
F152 F 0.41689(19) 1.4015(4) 0.39930(18) 0.0640(10) Uani 1 1 d . . . 
F153 F 0.35525(16) 1.3115(4) 0.29748(17) 0.0531(9) Uani 1 1 d . . . 
F231 F 0.14530(16) 1.2139(5) 0.62816(15) 0.0652(11) Uani 1 1 d . . . 
F232 F 0.19020(17) 1.3611(4) 0.55949(17) 0.0587(9) Uani 1 1 d . . . 
F233 F 0.22283(16) 1.1127(4) 0.58133(16) 0.0565(9) Uani 1 1 d . . . 
F251 F -0.07854(16) 1.3974(4) 0.36289(19) 0.0630(10) Uani 1 1 d . . . 
F252 F -0.13318(14) 1.1810(4) 0.38129(17) 0.0509(9) Uani 1 1 d . . . 
F253 F -0.09314(16) 1.3489(4) 0.46752(17) 0.0569(9) Uani 1 1 d . . . 
C11 C 0.2693(3) 0.7088(6) 0.4899(3) 0.0340(12) Uani 1 1 d . . . 
H11A H 0.2219 0.6981 0.4903 0.041 Uiso 1 1 calc R . . 
C12 C 0.3231(3) 0.6195(6) 0.5318(3) 0.0358(13) Uani 1 1 d . . . 
H12A H 0.3198 0.5398 0.5656 0.043 Uiso 1 1 calc R . . 
C13 C 0.3849(3) 0.6708(6) 0.5139(3) 0.0371(13) Uani 1 1 d . . . 
H13A H 0.4303 0.6297 0.5338 0.045 Uiso 1 1 calc R . . 
C13' C 0.5870(3) 0.8257(7) 0.3818(3) 0.0457(14) Uani 1 1 d . . . 
C14 C 0.3673(2) 0.7910(6) 0.4627(2) 0.0290(12) Uani 1 1 d . . . 
C15' C 0.4198(3) 1.3026(7) 0.3440(3) 0.0413(14) Uani 1 1 d . . . 
C21 C 0.1193(3) 0.6297(6) 0.3085(3) 0.0324(12) Uani 1 1 d . . . 
H21A H 0.1515 0.5722 0.2895 0.039 Uiso 1 1 calc R . . 
C22 C 0.0524(3) 0.5792(6) 0.3032(3) 0.0334(12) Uani 1 1 d . . . 
H22A H 0.0310 0.4828 0.2817 0.040 Uiso 1 1 calc R . . 
C23 C 0.0213(2) 0.7025(6) 0.3372(2) 0.0308(12) Uani 1 1 d . . . 
H23A H -0.0250 0.7028 0.3416 0.037 Uiso 1 1 calc R . . 
C23' C 0.1663(3) 1.2106(7) 0.5675(3) 0.0363(13) Uani 1 1 d . . . 
C24 C 0.0713(2) 0.8206(5) 0.3622(2) 0.0244(11) Uani 1 1 d . . . 
C25' C -0.0781(3) 1.2779(6) 0.4104(3) 0.0353(12) Uani 1 1 d . . . 
C31 C 0.2927(3) 0.6821(6) 0.2803(3) 0.0450(14) Uani 1 1 d . . . 
H31A H 0.3115 0.6678 0.2392 0.067 Uiso 1 1 calc R . . 
H31B H 0.2552 0.6042 0.2778 0.067 Uiso 1 1 calc R . . 
H31C H 0.3297 0.6641 0.3238 0.067 Uiso 1 1 calc R . . 
C32 C 0.2778(3) 0.9453(7) 0.2213(3) 0.0437(14) Uani 1 1 d . . . 
H32A H 0.2989 0.8762 0.1920 0.066 Uiso 1 1 calc R . . 
H32B H 0.3092 1.0351 0.2403 0.066 Uiso 1 1 calc R . . 
H32C H 0.2336 0.9882 0.1924 0.066 Uiso 1 1 calc R . . 
C41 C 0.1531(3) 1.1676(6) 0.2899(3) 0.0402(13) Uani 1 1 d . . . 
H41A H 0.1441 1.2840 0.2904 0.060 Uiso 1 1 calc R . . 
H41B H 0.1102 1.1080 0.2882 0.060 Uiso 1 1 calc R . . 
H41C H 0.1693 1.1406 0.2482 0.060 Uiso 1 1 calc R . . 
C42 C 0.2307(3) 1.2627(6) 0.4034(3) 0.0352(12) Uani 1 1 d . . . 
H42A H 0.2069 1.3609 0.3816 0.053 Uiso 1 1 calc R . . 
H42B H 0.2811 1.2766 0.4118 0.053 Uiso 1 1 calc R . . 
H42C H 0.2196 1.2428 0.4486 0.053 Uiso 1 1 calc R . . 
C141 C 0.4123(2) 0.8844(6) 0.4274(2) 0.0285(12) Uani 1 1 d . . . 
C142 C 0.4761(2) 0.8168(6) 0.4203(3) 0.0313(12) Uani 1 1 d . . . 
H14C H 0.4891 0.7112 0.4377 0.038 Uiso 1 1 calc R . . 
C143 C 0.5204(2) 0.9049(6) 0.3876(3) 0.0320(12) Uani 1 1 d . . . 
C144 C 0.5018(3) 1.0619(6) 0.3610(3) 0.0360(13) Uani 1 1 d . . . 
H14B H 0.5310 1.1202 0.3384 0.043 Uiso 1 1 calc R . . 
C145 C 0.4399(2) 1.1307(6) 0.3684(2) 0.0294(12) Uani 1 1 d . . . 
C146 C 0.3961(2) 1.0439(6) 0.4013(3) 0.0326(12) Uani 1 1 d . . . 
H14A H 0.3547 1.0935 0.4062 0.039 Uiso 1 1 calc R . . 
C241 C 0.0645(2) 0.9661(5) 0.4050(2) 0.0236(11) Uani 1 1 d . . . 
C242 C 0.1186(2) 1.0208(6) 0.4630(2) 0.0264(11) Uani 1 1 d . . . 
H24B H 0.1619 0.9660 0.4745 0.032 Uiso 1 1 calc R . . 
C243 C 0.1092(2) 1.1564(6) 0.5046(2) 0.0266(11) Uani 1 1 d . . . 
C244 C 0.0451(2) 1.2390(6) 0.4881(3) 0.0297(12) Uani 1 1 d . . . 
H24C H 0.0385 1.3293 0.5155 0.036 Uiso 1 1 calc R . . 
C245 C -0.0091(2) 1.1865(6) 0.4306(3) 0.0287(11) Uani 1 1 d . . . 
C246 C 0.0002(2) 1.0527(6) 0.3891(2) 0.0266(11) Uani 1 1 d . . . 
H24A H -0.0367 1.0199 0.3501 0.032 Uiso 1 1 calc R . . 
  
loop_ 
 _atom_site_aniso_label 
 _atom_site_aniso_U_11 
 _atom_site_aniso_U_22 
 _atom_site_aniso_U_33 
 _atom_site_aniso_U_23 
 _atom_site_aniso_U_13 
 _atom_site_aniso_U_12 
Ti 0.0255(5) 0.0230(5) 0.0300(5) 0.0014(4) 0.0091(4) 0.0015(4) 
N1 0.025(2) 0.026(2) 0.036(2) 0.0061(19) 0.0091(18) 0.0021(18) 
N2 0.029(2) 0.024(2) 0.030(2) -0.0019(18) 0.0107(18) 0.0035(18) 
N3 0.033(2) 0.029(2) 0.033(2) 0.0019(19) 0.0126(19) 0.0026(19) 
N4 0.027(2) 0.024(2) 0.024(2) -0.0023(18) 0.0064(18) 0.0007(17) 
F131 0.045(2) 0.116(3) 0.063(2) 0.014(2) 0.0126(18) 0.038(2) 
F132 0.061(2) 0.066(3) 0.100(3) -0.025(2) 0.036(2) 0.0113(19) 
F133 0.046(2) 0.076(3) 0.097(3) 0.017(2) 0.039(2) 0.0110(18) 
F151 0.054(2) 0.046(2) 0.091(3) 0.0232(18) 0.031(2) -0.0019(16) 
F152 0.096(3) 0.0323(18) 0.065(2) -0.0065(17) 0.024(2) 0.0068(18) 
F153 0.0443(19) 0.0423(19) 0.067(2) 0.0166(16) 0.0053(17) 0.0073(15) 
F231 0.045(2) 0.120(3) 0.0333(18) -0.0263(19) 0.0158(16) -0.016(2) 
F232 0.059(2) 0.045(2) 0.065(2) -0.0126(17) 0.0030(17) -0.0227(17) 
F233 0.0372(18) 0.064(2) 0.059(2) -0.0239(17) -0.0042(15) 0.0099(17) 
F251 0.050(2) 0.053(2) 0.091(3) 0.041(2) 0.0288(19) 0.0181(16) 
F252 0.0282(17) 0.0431(19) 0.077(2) -0.0045(16) 0.0067(16) 0.0020(15) 
F253 0.047(2) 0.059(2) 0.067(2) -0.0133(17) 0.0189(17) 0.0216(16) 
C11 0.038(3) 0.029(3) 0.040(3) 0.005(2) 0.019(3) 0.001(2) 
C12 0.040(3) 0.034(3) 0.036(3) 0.011(2) 0.015(3) 0.007(3) 
C13 0.034(3) 0.040(3) 0.035(3) 0.008(3) 0.005(2) 0.009(3) 
C13' 0.039(3) 0.048(4) 0.052(4) 0.004(3) 0.017(3) 0.004(3) 
C14 0.029(3) 0.028(3) 0.030(3) -0.002(2) 0.007(2) 0.005(2) 
C15' 0.039(3) 0.033(3) 0.052(4) 0.003(3) 0.011(3) -0.001(3) 
C21 0.035(3) 0.026(3) 0.039(3) -0.004(2) 0.015(2) 0.004(2) 
C22 0.033(3) 0.029(3) 0.037(3) -0.007(2) 0.008(2) -0.006(2) 
C23 0.025(3) 0.034(3) 0.035(3) -0.001(2) 0.010(2) -0.003(2) 
C23' 0.027(3) 0.041(3) 0.044(3) -0.009(3) 0.015(3) -0.001(3) 
C24 0.026(3) 0.022(3) 0.025(3) 0.002(2) 0.007(2) 0.002(2) 
C25' 0.034(3) 0.033(3) 0.041(3) -0.001(3) 0.014(3) 0.003(3) 
C31 0.045(3) 0.039(3) 0.055(4) -0.008(3) 0.019(3) 0.002(3) 
C32 0.046(3) 0.048(4) 0.041(3) -0.004(3) 0.019(3) 0.000(3) 
C41 0.048(3) 0.032(3) 0.037(3) 0.004(2) 0.007(3) 0.011(3) 
C42 0.039(3) 0.030(3) 0.040(3) -0.003(2) 0.016(2) -0.001(2) 
C141 0.028(3) 0.025(3) 0.030(3) -0.002(2) 0.003(2) 0.001(2) 
C142 0.023(3) 0.031(3) 0.037(3) -0.001(2) 0.003(2) 0.004(2) 
C143 0.024(3) 0.036(3) 0.036(3) -0.005(2) 0.008(2) 0.002(2) 
C144 0.031(3) 0.041(3) 0.038(3) -0.004(2) 0.011(2) -0.009(2) 
C145 0.028(3) 0.026(3) 0.036(3) -0.001(2) 0.011(2) 0.002(2) 
C146 0.023(3) 0.034(3) 0.038(3) -0.004(2) 0.004(2) 0.003(2) 
C241 0.022(3) 0.022(3) 0.030(3) 0.000(2) 0.012(2) -0.001(2) 
C242 0.027(3) 0.025(3) 0.030(3) -0.001(2) 0.012(2) 0.001(2) 
C243 0.029(3) 0.027(3) 0.026(3) -0.001(2) 0.011(2) -0.002(2) 
C244 0.030(3) 0.027(3) 0.036(3) -0.001(2) 0.016(2) 0.001(2) 
C245 0.028(3) 0.023(3) 0.038(3) 0.003(2) 0.012(2) 0.003(2) 
C246 0.025(3) 0.029(3) 0.026(3) 0.004(2) 0.007(2) -0.002(2) 
  
_geom_special_details 
; 
 All esds (except the esd in the dihedral angle between two l.s. planes) 
 are estimated using the full covariance matrix.  The cell esds are taken 
 into account individually in the estimation of esds in distances, angles 
 and torsion angles; correlations between esds in cell parameters are only 
 used when they are defined by crystal symmetry.  An approximate (isotropic) 
 treatment of cell esds is used for estimating esds involving l.s. planes. 
; 
  
loop_ 
 _geom_bond_atom_site_label_1 
 _geom_bond_atom_site_label_2 
 _geom_bond_distance 
 _geom_bond_site_symmetry_2 
 _geom_bond_publ_flag 
Ti N4 1.848(4) . ? 
Ti N3 1.855(4) . ? 
Ti N1 1.989(4) . ? 
Ti N2 2.011(4) . ? 
N1 C11 1.385(6) . ? 
N1 C14 1.404(6) . ? 
N2 C21 1.380(6) . ? 
N2 C24 1.398(6) . ? 
N3 C32 1.447(6) . ? 
N3 C31 1.460(6) . ? 
N4 C41 1.455(6) . ? 
N4 C42 1.462(6) . ? 
F131 C13' 1.333(6) . ? 
F132 C13' 1.329(6) . ? 
F133 C13' 1.332(6) . ? 
F151 C15' 1.327(6) . ? 
F152 C15' 1.343(6) . ? 
F153 C15' 1.341(6) . ? 
F231 C23' 1.331(6) . ? 
F232 C23' 1.330(6) . ? 
F233 C23' 1.329(6) . ? 
F251 C25' 1.327(6) . ? 
F252 C25' 1.330(6) . ? 
F253 C25' 1.338(5) . ? 
C11 C12 1.352(7) . ? 
C12 C13 1.401(7) . ? 
C13 C14 1.362(6) . ? 
C13' C143 1.481(7) . ? 
C14 C141 1.456(6) . ? 
C15' C145 1.488(7) . ? 
C21 C22 1.348(7) . ? 
C22 C23 1.414(7) . ? 
C23 C24 1.361(6) . ? 
C23' C243 1.478(7) . ? 
C24 C241 1.463(6) . ? 
C25' C245 1.498(7) . ? 
C141 C146 1.392(6) . ? 
C141 C142 1.401(6) . ? 
C142 C143 1.390(7) . ? 
C143 C144 1.383(7) . ? 
C144 C145 1.374(7) . ? 
C145 C146 1.381(7) . ? 
C241 C242 1.390(6) . ? 
C241 C246 1.400(6) . ? 
C242 C243 1.397(6) . ? 
C243 C244 1.381(6) . ? 
C244 C245 1.377(6) . ? 
C245 C246 1.386(6) . ? 
  
loop_ 
 _geom_angle_atom_site_label_1 
 _geom_angle_atom_site_label_2 
 _geom_angle_atom_site_label_3 
 _geom_angle 
 _geom_angle_site_symmetry_1 
 _geom_angle_site_symmetry_3 
 _geom_angle_publ_flag 
N4 Ti N3 108.88(17) . . ? 
N4 Ti N1 114.72(16) . . ? 
N3 Ti N1 107.32(16) . . ? 
N4 Ti N2 107.97(16) . . ? 
N3 Ti N2 110.59(16) . . ? 
N1 Ti N2 107.36(15) . . ? 
C11 N1 C14 105.2(4) . . ? 
C11 N1 Ti 118.6(3) . . ? 
C14 N1 Ti 130.4(3) . . ? 
C21 N2 C24 104.8(4) . . ? 
C21 N2 Ti 122.8(3) . . ? 
C24 N2 Ti 132.0(3) . . ? 
C32 N3 C31 111.0(4) . . ? 
C32 N3 Ti 133.5(3) . . ? 
C31 N3 Ti 115.4(3) . . ? 
C41 N4 C42 112.6(4) . . ? 
C41 N4 Ti 110.8(3) . . ? 
C42 N4 Ti 136.5(3) . . ? 
C12 C11 N1 111.1(4) . . ? 
C11 C12 C13 106.4(4) . . ? 
C14 C13 C12 108.6(4) . . ? 
F132 C13' F133 105.7(5) . . ? 
F132 C13' F131 105.6(5) . . ? 
F133 C13' F131 106.6(5) . . ? 
F132 C13' C143 113.3(5) . . ? 
F133 C13' C143 112.8(5) . . ? 
F131 C13' C143 112.3(5) . . ? 
C13 C14 N1 108.7(4) . . ? 
C13 C14 C141 129.7(4) . . ? 
N1 C14 C141 121.6(4) . . ? 
F151 C15' F153 106.4(4) . . ? 
F151 C15' F152 106.3(4) . . ? 
F153 C15' F152 105.4(4) . . ? 
F151 C15' C145 113.8(4) . . ? 
F153 C15' C145 112.5(4) . . ? 
F152 C15' C145 111.9(4) . . ? 
C22 C21 N2 111.8(4) . . ? 
C21 C22 C23 106.1(4) . . ? 
C24 C23 C22 107.6(4) . . ? 
F233 C23' F232 105.8(4) . . ? 
F233 C23' F231 105.6(4) . . ? 
F232 C23' F231 106.3(4) . . ? 
F233 C23' C243 113.2(4) . . ? 
F232 C23' C243 113.0(4) . . ? 
F231 C23' C243 112.3(4) . . ? 
C23 C24 N2 109.6(4) . . ? 
C23 C24 C241 127.0(4) . . ? 
N2 C24 C241 123.2(4) . . ? 
F251 C25' F252 106.6(4) . . ? 
F251 C25' F253 106.6(4) . . ? 
F252 C25' F253 105.6(4) . . ? 
F251 C25' C245 112.4(4) . . ? 
F252 C25' C245 113.0(4) . . ? 
F253 C25' C245 112.2(4) . . ? 
C146 C141 C142 116.9(5) . . ? 
C146 C141 C14 122.8(4) . . ? 
C142 C141 C14 120.3(4) . . ? 
C143 C142 C141 121.2(5) . . ? 
C144 C143 C142 120.4(4) . . ? 
C144 C143 C13' 121.4(5) . . ? 
C142 C143 C13' 118.3(5) . . ? 
C145 C144 C143 119.2(5) . . ? 
C144 C145 C146 120.6(5) . . ? 
C144 C145 C15' 120.9(5) . . ? 
C146 C145 C15' 118.5(4) . . ? 
C145 C146 C141 121.8(4) . . ? 
C242 C241 C246 117.6(4) . . ? 
C242 C241 C24 123.0(4) . . ? 
C246 C241 C24 119.4(4) . . ? 
C241 C242 C243 121.4(4) . . ? 
C244 C243 C242 119.9(4) . . ? 
C244 C243 C23' 119.1(4) . . ? 
C242 C243 C23' 121.0(4) . . ? 
C245 C244 C243 119.5(4) . . ? 
C244 C245 C246 120.8(4) . . ? 
C244 C245 C25' 120.3(4) . . ? 
C246 C245 C25' 118.9(4) . . ? 
C245 C246 C241 120.8(4) . . ? 
  
_diffrn_measured_fraction_theta_max    0.999 
_diffrn_reflns_theta_full              23.30 
_diffrn_measured_fraction_theta_full   0.999 
_refine_diff_density_max    0.573 
_refine_diff_density_min   -0.536 
_refine_diff_density_rms    0.072 
  
#===END

data_05013t 
  
_audit_creation_method            SHELXL-97 
_chemical_name_systematic 
; 
 ? 
; 
_chemical_name_common             ? 
_chemical_melting_point           ? 
_chemical_formula_moiety          ? 
_chemical_formula_sum 
 'C31 H28 F12 N4 Ti' 
_chemical_formula_weight          732.47 
  
loop_ 
 _atom_type_symbol 
 _atom_type_description 
 _atom_type_scat_dispersion_real 
 _atom_type_scat_dispersion_imag 
 _atom_type_scat_source 
 'C'  'C'   0.0033   0.0016 
 'International Tables Vol C Tables 4.2.6.8 and 6.1.1.4' 
 'H'  'H'   0.0000   0.0000 
 'International Tables Vol C Tables 4.2.6.8 and 6.1.1.4' 
 'N'  'N'   0.0061   0.0033 
 'International Tables Vol C Tables 4.2.6.8 and 6.1.1.4' 
 'F'  'F'   0.0171   0.0103 
 'International Tables Vol C Tables 4.2.6.8 and 6.1.1.4' 
 'Ti'  'Ti'   0.2776   0.4457 
 'International Tables Vol C Tables 4.2.6.8 and 6.1.1.4' 
  
_symmetry_cell_setting            Triclinic 
_symmetry_space_group_name_H-M    P-1 
  
loop_ 
 _symmetry_equiv_pos_as_xyz 
 'x, y, z' 
 '-x, -y, -z' 
  
_cell_length_a                    12.602(10) 
_cell_length_b                    12.626(11) 
_cell_length_c                    12.793(11) 
_cell_angle_alpha                 78.106(14) 
_cell_angle_beta                  64.440(12) 
_cell_angle_gamma                 62.658(12) 
_cell_volume                      1631(2) 
_cell_formula_units_Z             2 
_cell_measurement_temperature     172(2) 
_cell_measurement_reflns_used     ? 
_cell_measurement_theta_min       ? 
_cell_measurement_theta_max       ? 
  
_exptl_crystal_description        ? 
_exptl_crystal_colour             orange 
_exptl_crystal_size_max           0.48 
_exptl_crystal_size_mid           0.32
_exptl_crystal_size_min           0.21 
_exptl_crystal_density_meas       ? 
_exptl_crystal_density_diffrn     1.491 
_exptl_crystal_density_method     'not measured' 
_exptl_crystal_F_000              744 
_exptl_absorpt_coefficient_mu     0.359 
_exptl_absorpt_correction_type    empirical 
_exptl_absorpt_correction_T_min   0.7586 
_exptl_absorpt_correction_T_max   1.0000 
_exptl_absorpt_process_details    ? 
  
_exptl_special_details 
; 
 ? 
; 
  
_diffrn_ambient_temperature       172(2) 
_diffrn_radiation_wavelength      0.71073 
_diffrn_radiation_type            MoK\a 
_diffrn_radiation_source          'fine-focus sealed tube' 
_diffrn_radiation_monochromator   graphite 
_diffrn_measurement_device_type   'CCD area detector' 
_diffrn_measurement_method        'phi and omega scans' 
_diffrn_detector_area_resol_mean  ? 
_diffrn_standards_number          ? 
_diffrn_standards_interval_count  ? 
_diffrn_standards_interval_time   ? 
_diffrn_standards_decay_%         ? 
_diffrn_reflns_number             10574 
_diffrn_reflns_av_R_equivalents   0.0614 
_diffrn_reflns_av_sigmaI/netI     0.0855 
_diffrn_reflns_limit_h_min        -14 
_diffrn_reflns_limit_h_max        13 
_diffrn_reflns_limit_k_min        -14 
_diffrn_reflns_limit_k_max        13 
_diffrn_reflns_limit_l_min        -14 
_diffrn_reflns_limit_l_max        14 
_diffrn_reflns_theta_min          1.76 
_diffrn_reflns_theta_max          23.46 
_reflns_number_total              4699 
_reflns_number_gt                 2953 
_reflns_threshold_expression      >2sigma(I) 
  
_computing_data_collection        'Bruker SMART' 
_computing_cell_refinement        'Bruker SMART' 
_computing_data_reduction         'Bruker SHELXTL' 
_computing_structure_solution     'SHELXS-97 (Sheldrick, 1990)' 
_computing_structure_refinement   'SHELXL-97 (Sheldrick, 1997)' 
_computing_molecular_graphics     'Bruker SHELXTL' 
_computing_publication_material   'Bruker SHELXTL' 
  
_refine_special_details 
; 
 Refinement of F^2^ against ALL reflections.  The weighted R-factor wR and 
 goodness of fit S are based on F^2^, conventional R-factors R are based 
 on F, with F set to zero for negative F^2^. The threshold expression of 
 F^2^ > 2sigma(F^2^) is used only for calculating R-factors(gt) etc. and is 
 not relevant to the choice of reflections for refinement.  R-factors based 
 on F^2^ are statistically about twice as large as those based on F, and R- 
 factors based on ALL data will be even larger. 
; 
  
_refine_ls_structure_factor_coef  Fsqd 
_refine_ls_matrix_type            full 
_refine_ls_weighting_scheme       calc 
_refine_ls_weighting_details 
 'calc w=1/[\s^2^(Fo^2^)+(0.0968P)^2^+3.7822P] where P=(Fo^2^+2Fc^2^)/3' 
_atom_sites_solution_primary      direct 
_atom_sites_solution_secondary    difmap 
_atom_sites_solution_hydrogens    geom 
_refine_ls_hydrogen_treatment     mixed 
_refine_ls_extinction_method      SHELXL 
_refine_ls_extinction_coef        0.0059(19) 
_refine_ls_extinction_expression 
 'Fc^*^=kFc[1+0.001xFc^2^\l^3^/sin(2\q)]^-1/4^' 
_refine_ls_number_reflns          4699 
_refine_ls_number_parameters      434 
_refine_ls_number_restraints      0 
_refine_ls_R_factor_all           0.1120 
_refine_ls_R_factor_gt            0.0634 
_refine_ls_wR_factor_ref          0.2010 
_refine_ls_wR_factor_gt           0.1648 
_refine_ls_goodness_of_fit_ref    1.009 
_refine_ls_restrained_S_all       1.009 
_refine_ls_shift/su_max           0.001 
_refine_ls_shift/su_mean          0.000 
  
loop_ 
 _atom_site_label 
 _atom_site_type_symbol 
 _atom_site_fract_x 
 _atom_site_fract_y 
 _atom_site_fract_z 
 _atom_site_U_iso_or_equiv 
 _atom_site_adp_type 
 _atom_site_occupancy 
 _atom_site_symmetry_multiplicity 
 _atom_site_calc_flag 
 _atom_site_refinement_flags 
 _atom_site_disorder_assembly 
 _atom_site_disorder_group 
Ti Ti -0.32452(9) 1.74066(9) 0.73906(8) 0.0256(3) Uani 1 1 d . . . 
N1 N -0.2644(6) 1.5332(5) 0.7030(5) 0.0516(15) Uani 1 1 d . . . 
N2 N -0.1962(4) 1.7391(4) 0.5719(4) 0.0255(11) Uani 1 1 d . . . 
N3 N -0.2348(4) 1.7255(4) 0.8316(4) 0.0298(11) Uani 1 1 d . . . 
N4 N -0.4525(4) 1.8975(4) 0.7549(4) 0.0332(12) Uani 1 1 d . . . 
F131 F -0.1245(7) 1.1395(5) 1.0758(6) 0.151(3) Uani 1 1 d . . . 
F132 F -0.0018(7) 1.2150(6) 1.0399(9) 0.197(5) Uani 1 1 d . . . 
F133 F -0.0243(5) 1.1656(4) 0.9064(5) 0.1046(19) Uani 1 1 d . . . 
F151 F -0.4136(5) 1.5122(4) 1.3249(3) 0.0824(15) Uani 1 1 d . . . 
F152 F -0.4256(5) 1.6742(4) 1.2290(4) 0.0862(16) Uani 1 1 d . . . 
F153 F -0.5685(5) 1.6125(4) 1.2685(4) 0.0790(14) Uani 1 1 d . . . 
F231 F 0.2567(4) 1.9265(4) 0.5972(5) 0.0935(17) Uani 1 1 d . . . 
F232 F 0.3053(3) 1.8287(4) 0.4573(3) 0.0677(13) Uani 1 1 d . . . 
F233 F 0.2905(4) 1.7442(4) 0.6199(4) 0.0822(16) Uani 1 1 d . . . 
F251 F -0.2094(4) 2.0537(4) 0.9062(3) 0.0666(12) Uani 1 1 d . . . 
F252 F -0.3491(3) 2.0931(3) 0.8337(3) 0.0493(10) Uani 1 1 d . . . 
F253 F -0.2275(4) 2.1860(3) 0.7720(4) 0.0667(12) Uani 1 1 d . . . 
C1 C -0.2837(5) 1.6311(5) 0.5080(4) 0.0291(13) Uani 1 1 d . . . 
C2 C -0.3914(6) 1.7157(5) 0.4664(5) 0.0365(15) Uani 1 1 d . . . 
H2A H -0.4354 1.7910 0.5044 0.055 Uiso 1 1 calc R . . 
H2B H -0.4519 1.6820 0.4843 0.055 Uiso 1 1 calc R . . 
H2C H -0.3547 1.7274 0.3841 0.055 Uiso 1 1 calc R . . 
C3 C -0.2135(6) 1.5115(5) 0.4468(5) 0.0399(15) Uani 1 1 d . . . 
H3A H -0.2743 1.4786 0.4631 0.060 Uiso 1 1 calc R . . 
H3B H -0.1469 1.4575 0.4742 0.060 Uiso 1 1 calc R . . 
H3C H -0.1752 1.5232 0.3647 0.060 Uiso 1 1 calc R . . 
C11 C -0.3394(5) 1.6123(5) 0.6379(5) 0.0277(13) Uani 1 1 d . . . 
C12 C -0.4619(6) 1.6786(5) 0.7187(5) 0.0324(14) Uani 1 1 d . . . 
H12B H -0.5376 1.7313 0.6999 0.039 Uiso 1 1 calc R . . 
C13 C -0.4643(5) 1.6515(4) 0.8293(4) 0.0164(11) Uani 1 1 d . . . 
H12A H -0.5416 1.6782 0.9011 0.020 Uiso 1 1 calc R . . 
C13' C -0.0821(9) 1.2199(7) 1.0052(7) 0.070(2) Uani 1 1 d . . . 
C14 C -0.3480(6) 1.5597(5) 0.8198(5) 0.0311(14) Uani 1 1 d . . . 
C15' C -0.4403(8) 1.5757(6) 1.2356(6) 0.0505(18) Uani 1 1 d . . . 
C21 C -0.1895(5) 1.6848(5) 0.4839(5) 0.0293(13) Uani 1 1 d . . . 
C22 C -0.0926(6) 1.6906(5) 0.3821(5) 0.0368(15) Uani 1 1 d . . . 
H22A H -0.0697 1.6612 0.3109 0.044 Uiso 1 1 calc R . . 
C23 C -0.0340(6) 1.7499(5) 0.4056(5) 0.0356(15) Uani 1 1 d . . . 
H23A H 0.0353 1.7665 0.3525 0.043 Uiso 1 1 calc R . . 
C23' C 0.2347(6) 1.8453(6) 0.5710(5) 0.0410(16) Uani 1 1 d . . . 
C24 C -0.0976(5) 1.7788(5) 0.5209(4) 0.0267(13) Uani 1 1 d . . . 
C25' C -0.2289(6) 2.0790(6) 0.8062(5) 0.0397(15) Uani 1 1 d . . . 
C31 C -0.1124(6) 1.6239(6) 0.8224(6) 0.0479(17) Uani 1 1 d . . . 
H31A H -0.0828 1.6327 0.8765 0.072 Uiso 1 1 calc R . . 
H31B H -0.0490 1.6203 0.7451 0.072 Uiso 1 1 calc R . . 
H31C H -0.1248 1.5517 0.8397 0.072 Uiso 1 1 calc R . . 
C32 C -0.2782(6) 1.8034(6) 0.9254(5) 0.0431(16) Uani 1 1 d . . . 
H32A H -0.2135 1.7746 0.9574 0.065 Uiso 1 1 calc R . . 
H32B H -0.3578 1.8038 0.9846 0.065 Uiso 1 1 calc R . . 
H32C H -0.2920 1.8829 0.8957 0.065 Uiso 1 1 calc R . . 
C41 C -0.4737(6) 1.9845(5) 0.6636(5) 0.0429(16) Uani 1 1 d . . . 
H41A H -0.5469 2.0573 0.6973 0.064 Uiso 1 1 calc R . . 
H41B H -0.4902 1.9538 0.6122 0.064 Uiso 1 1 calc R . . 
H41C H -0.3981 1.9999 0.6209 0.064 Uiso 1 1 calc R . . 
C42 C -0.5682(7) 1.9331(6) 0.8638(5) 0.0562(19) Uani 1 1 d . . . 
H42A H -0.6244 2.0154 0.8584 0.084 Uiso 1 1 calc R . . 
H42B H -0.5424 1.9225 0.9270 0.084 Uiso 1 1 calc R . . 
H42C H -0.6133 1.8847 0.8767 0.084 Uiso 1 1 calc R . . 
C141 C -0.3200(6) 1.5020(5) 0.9235(5) 0.0314(14) Uani 1 1 d . . . 
C142 C -0.2197(6) 1.3909(5) 0.9161(5) 0.0383(15) Uani 1 1 d . . . 
H14B H -0.1717 1.3505 0.8461 0.046 Uiso 1 1 calc R . . 
C143 C -0.1897(7) 1.3386(6) 1.0121(6) 0.0449(17) Uani 1 1 d . . . 
C144 C -0.2614(7) 1.3978(6) 1.1173(6) 0.0457(17) Uani 1 1 d . . . 
H14C H -0.2412 1.3629 1.1816 0.055 Uiso 1 1 calc R . . 
C145 C -0.3627(6) 1.5085(6) 1.1257(5) 0.0387(15) Uani 1 1 d . . . 
C146 C -0.3935(6) 1.5611(5) 1.0289(5) 0.0340(14) Uani 1 1 d . . . 
H14A H -0.4629 1.6352 1.0351 0.041 Uiso 1 1 calc R . . 
C241 C -0.0674(5) 1.8413(5) 0.5817(4) 0.0258(13) Uani 1 1 d . . . 
C242 C 0.0621(5) 1.8192(5) 0.5501(5) 0.0312(14) Uani 1 1 d . . . 
H24C H 0.1269 1.7636 0.4929 0.037 Uiso 1 1 calc R . . 
C243 C 0.0954(5) 1.8778(5) 0.6018(5) 0.0281(13) Uani 1 1 d . . . 
C244 C 0.0004(5) 1.9621(5) 0.6873(5) 0.0305(14) Uani 1 1 d . . . 
H24A H 0.0227 2.0010 0.7232 0.037 Uiso 1 1 calc R . . 
C245 C -0.1280(5) 1.9865(5) 0.7175(4) 0.0269(13) Uani 1 1 d . . . 
C246 C -0.1618(5) 1.9268(5) 0.6664(4) 0.0275(13) Uani 1 1 d . . . 
H24B H -0.2487 1.9439 0.6889 0.033 Uiso 1 1 calc R . . 
  
loop_ 
 _atom_site_aniso_label 
 _atom_site_aniso_U_11 
 _atom_site_aniso_U_22 
 _atom_site_aniso_U_33 
 _atom_site_aniso_U_23 
 _atom_site_aniso_U_13 
 _atom_site_aniso_U_12 
Ti 0.0279(6) 0.0296(6) 0.0199(6) 0.0048(4) -0.0105(4) -0.0135(5) 
N1 0.072(4) 0.056(4) 0.050(4) 0.017(3) -0.037(3) -0.040(3) 
N2 0.026(3) 0.027(3) 0.023(2) 0.001(2) -0.012(2) -0.009(2) 
N3 0.036(3) 0.034(3) 0.025(3) 0.005(2) -0.015(2) -0.019(2) 
N4 0.032(3) 0.035(3) 0.026(3) 0.001(2) -0.006(2) -0.014(2) 
F131 0.175(7) 0.066(4) 0.130(5) 0.042(4) -0.047(5) -0.015(4) 
F132 0.163(7) 0.099(5) 0.391(13) -0.079(6) -0.229(9) 0.041(5) 
F133 0.108(4) 0.073(3) 0.086(4) -0.003(3) -0.051(3) 0.013(3) 
F151 0.127(4) 0.075(3) 0.039(2) 0.012(2) -0.050(3) -0.026(3) 
F152 0.153(5) 0.084(3) 0.051(3) 0.000(2) -0.031(3) -0.081(3) 
F153 0.080(3) 0.097(4) 0.058(3) -0.018(2) -0.020(3) -0.034(3) 
F231 0.043(3) 0.097(4) 0.151(5) -0.049(3) -0.022(3) -0.033(3) 
F232 0.032(2) 0.111(4) 0.047(2) 0.012(2) -0.0100(19) -0.029(2) 
F233 0.044(2) 0.097(3) 0.094(3) 0.063(3) -0.042(2) -0.031(2) 
F251 0.060(3) 0.101(3) 0.034(2) -0.020(2) -0.0095(19) -0.030(2) 
F252 0.033(2) 0.054(2) 0.054(2) -0.0167(18) -0.0023(17) -0.0192(18) 
F253 0.061(3) 0.039(2) 0.077(3) -0.017(2) 0.007(2) -0.027(2) 
C1 0.032(3) 0.034(3) 0.022(3) 0.000(2) -0.012(3) -0.013(3) 
C2 0.040(4) 0.045(4) 0.023(3) 0.003(3) -0.018(3) -0.012(3) 
C3 0.041(4) 0.040(4) 0.041(4) -0.003(3) -0.017(3) -0.017(3) 
C11 0.036(3) 0.029(3) 0.029(3) 0.012(3) -0.021(3) -0.019(3) 
C12 0.031(3) 0.044(4) 0.031(3) 0.007(3) -0.016(3) -0.022(3) 
C13 0.015(3) 0.026(3) 0.008(2) 0.005(2) -0.004(2) -0.012(2) 
C13' 0.093(7) 0.052(5) 0.064(6) 0.013(4) -0.050(5) -0.015(5) 
C14 0.045(4) 0.038(3) 0.022(3) 0.008(3) -0.015(3) -0.030(3) 
C15' 0.083(6) 0.054(4) 0.039(4) 0.017(3) -0.036(4) -0.043(4) 
C21 0.034(3) 0.029(3) 0.026(3) 0.004(2) -0.016(3) -0.011(3) 
C22 0.042(4) 0.043(4) 0.025(3) 0.001(3) -0.012(3) -0.020(3) 
C23 0.036(4) 0.043(4) 0.025(3) 0.003(3) -0.006(3) -0.021(3) 
C23' 0.035(4) 0.052(4) 0.040(4) 0.005(3) -0.017(3) -0.022(3) 
C24 0.026(3) 0.030(3) 0.024(3) 0.003(2) -0.008(2) -0.014(3) 
C25' 0.037(4) 0.046(4) 0.036(4) -0.001(3) -0.006(3) -0.024(3) 
C31 0.045(4) 0.057(4) 0.056(4) 0.008(3) -0.030(3) -0.026(4) 
C32 0.065(5) 0.049(4) 0.024(3) 0.005(3) -0.017(3) -0.034(4) 
C41 0.042(4) 0.038(4) 0.042(4) 0.011(3) -0.020(3) -0.014(3) 
C42 0.051(4) 0.055(4) 0.036(4) -0.004(3) 0.000(3) -0.015(4) 
C141 0.041(4) 0.034(3) 0.034(3) 0.011(3) -0.023(3) -0.023(3) 
C142 0.053(4) 0.035(4) 0.035(4) 0.008(3) -0.021(3) -0.024(3) 
C143 0.061(5) 0.044(4) 0.044(4) 0.019(3) -0.037(4) -0.027(4) 
C144 0.067(5) 0.050(4) 0.044(4) 0.022(3) -0.041(4) -0.034(4) 
C145 0.059(4) 0.046(4) 0.031(3) 0.014(3) -0.027(3) -0.035(4) 
C146 0.045(4) 0.035(3) 0.034(3) 0.011(3) -0.021(3) -0.025(3) 
C241 0.028(3) 0.025(3) 0.022(3) 0.008(2) -0.009(2) -0.012(3) 
C242 0.031(3) 0.031(3) 0.025(3) 0.009(3) -0.009(3) -0.012(3) 
C243 0.026(3) 0.030(3) 0.031(3) 0.010(3) -0.015(3) -0.015(3) 
C244 0.038(4) 0.034(3) 0.025(3) 0.010(3) -0.015(3) -0.021(3) 
C245 0.029(3) 0.029(3) 0.023(3) 0.006(2) -0.010(3) -0.015(3) 
C246 0.025(3) 0.031(3) 0.024(3) 0.008(2) -0.008(2) -0.014(3) 
  
_geom_special_details 
; 
 All esds (except the esd in the dihedral angle between two l.s. planes) 
 are estimated using the full covariance matrix.  The cell esds are taken 
 into account individually in the estimation of esds in distances, angles 
 and torsion angles; correlations between esds in cell parameters are only 
 used when they are defined by crystal symmetry.  An approximate (isotropic) 
 treatment of cell esds is used for estimating esds involving l.s. planes. 
; 
  
loop_ 
 _geom_bond_atom_site_label_1 
 _geom_bond_atom_site_label_2 
 _geom_bond_distance 
 _geom_bond_site_symmetry_2 
 _geom_bond_publ_flag 
Ti N4 1.875(5) . ? 
Ti N3 1.892(5) . ? 
Ti N2 2.048(5) . ? 
Ti C13 2.288(5) . ? 
Ti C12 2.324(6) . ? 
Ti C11 2.385(6) . ? 
Ti C14 2.400(6) . ? 
Ti N1 2.454(6) . ? 
N1 C14 1.407(8) . ? 
N1 C11 1.433(7) . ? 
N2 C21 1.387(7) . ? 
N2 C24 1.400(7) . ? 
N3 C31 1.459(8) . ? 
N3 C32 1.460(7) . ? 
N4 C41 1.454(7) . ? 
N4 C42 1.474(7) . ? 
F131 C13' 1.355(10) . ? 
F132 C13' 1.242(9) . ? 
F133 C13' 1.305(9) . ? 
F151 C15' 1.330(7) . ? 
F152 C15' 1.320(7) . ? 
F153 C15' 1.344(8) . ? 
F231 C23' 1.312(7) . ? 
F232 C23' 1.337(7) . ? 
F233 C23' 1.320(7) . ? 
F251 C25' 1.353(7) . ? 
F252 C25' 1.329(7) . ? 
F253 C25' 1.337(7) . ? 
C1 C11 1.514(7) . ? 
C1 C21 1.516(8) . ? 
C1 C2 1.525(8) . ? 
C1 C3 1.530(8) . ? 
C11 C12 1.395(8) . ? 
C12 C13 1.375(7) . ? 
C13 C14 1.361(7) . ? 
C13' C143 1.475(10) . ? 
C14 C141 1.478(8) . ? 
C15' C145 1.481(9) . ? 
C21 C22 1.365(8) . ? 
C22 C23 1.410(8) . ? 
C23 C24 1.373(7) . ? 
C23' C243 1.488(8) . ? 
C24 C241 1.468(7) . ? 
C25' C245 1.486(8) . ? 
C141 C142 1.378(8) . ? 
C141 C146 1.390(8) . ? 
C142 C143 1.387(8) . ? 
C143 C144 1.389(9) . ? 
C144 C145 1.378(9) . ? 
C145 C146 1.402(8) . ? 
C241 C246 1.395(7) . ? 
C241 C242 1.401(8) . ? 
C242 C243 1.374(8) . ? 
C243 C244 1.393(8) . ? 
C244 C245 1.384(8) . ? 
C245 C246 1.383(8) . ? 
  
loop_ 
 _geom_angle_atom_site_label_1 
 _geom_angle_atom_site_label_2 
 _geom_angle_atom_site_label_3 
 _geom_angle 
 _geom_angle_site_symmetry_1 
 _geom_angle_site_symmetry_3 
 _geom_angle_publ_flag 
N4 Ti N3 107.1(2) . . ? 
N4 Ti N2 102.63(19) . . ? 
N3 Ti N2 104.8(2) . . ? 
N4 Ti C13 96.1(2) . . ? 
N3 Ti C13 110.26(18) . . ? 
N2 Ti C13 132.93(17) . . ? 
N4 Ti C12 88.9(2) . . ? 
N3 Ti C12 144.2(2) . . ? 
N2 Ti C12 102.49(19) . . ? 
C13 Ti C12 34.69(18) . . ? 
N4 Ti C11 114.5(2) . . ? 
N3 Ti C11 137.58(19) . . ? 
N2 Ti C11 74.72(19) . . ? 
C13 Ti C11 58.22(18) . . ? 
C12 Ti C11 34.43(19) . . ? 
N4 Ti C14 129.0(2) . . ? 
N3 Ti C14 91.04(19) . . ? 
N2 Ti C14 118.41(19) . . ? 
C13 Ti C14 33.63(18) . . ? 
C12 Ti C14 55.3(2) . . ? 
C11 Ti C14 56.20(19) . . ? 
N4 Ti N1 145.4(2) . . ? 
N3 Ti N1 103.39(19) . . ? 
N2 Ti N1 84.88(18) . . ? 
C13 Ti N1 57.45(18) . . ? 
C12 Ti N1 56.5(2) . . ? 
C11 Ti N1 34.41(17) . . ? 
C14 Ti N1 33.67(18) . . ? 
C14 N1 C11 105.1(5) . . ? 
C14 N1 Ti 71.1(3) . . ? 
C11 N1 Ti 70.2(3) . . ? 
C21 N2 C24 105.8(4) . . ? 
C21 N2 Ti 121.7(4) . . ? 
C24 N2 Ti 132.4(3) . . ? 
C31 N3 C32 110.4(5) . . ? 
C31 N3 Ti 122.2(4) . . ? 
C32 N3 Ti 127.2(4) . . ? 
C41 N4 C42 110.6(5) . . ? 
C41 N4 Ti 127.8(4) . . ? 
C42 N4 Ti 119.4(4) . . ? 
C11 C1 C21 106.8(4) . . ? 
C11 C1 C2 110.3(5) . . ? 
C21 C1 C2 110.2(5) . . ? 
C11 C1 C3 109.7(5) . . ? 
C21 C1 C3 110.5(5) . . ? 
C2 C1 C3 109.3(5) . . ? 
C12 C11 N1 106.4(5) . . ? 
C12 C11 C1 128.6(5) . . ? 
N1 C11 C1 124.2(5) . . ? 
C12 C11 Ti 70.4(3) . . ? 
N1 C11 Ti 75.4(3) . . ? 
C1 C11 Ti 111.5(3) . . ? 
C13 C12 C11 110.4(5) . . ? 
C13 C12 Ti 71.2(3) . . ? 
C11 C12 Ti 75.2(3) . . ? 
C14 C13 C12 106.6(5) . . ? 
C14 C13 Ti 77.7(3) . . ? 
C12 C13 Ti 74.1(3) . . ? 
F132 C13' F133 111.0(9) . . ? 
F132 C13' F131 101.9(8) . . ? 
F133 C13' F131 99.6(7) . . ? 
F132 C13' C143 115.0(7) . . ? 
F133 C13' C143 115.7(6) . . ? 
F131 C13' C143 111.8(8) . . ? 
C13 C14 N1 111.2(5) . . ? 
C13 C14 C141 121.3(5) . . ? 
N1 C14 C141 127.5(5) . . ? 
C13 C14 Ti 68.7(3) . . ? 
N1 C14 Ti 75.2(3) . . ? 
C141 C14 Ti 121.7(4) . . ? 
F152 C15' F151 107.3(5) . . ? 
F152 C15' F153 104.6(6) . . ? 
F151 C15' F153 105.1(6) . . ? 
F152 C15' C145 112.9(6) . . ? 
F151 C15' C145 113.3(6) . . ? 
F153 C15' C145 113.1(5) . . ? 
C22 C21 N2 110.5(5) . . ? 
C22 C21 C1 129.1(5) . . ? 
N2 C21 C1 120.4(5) . . ? 
C21 C22 C23 106.9(5) . . ? 
C24 C23 C22 107.7(5) . . ? 
F231 C23' F233 107.4(5) . . ? 
F231 C23' F232 104.2(5) . . ? 
F233 C23' F232 104.8(5) . . ? 
F231 C23' C243 114.3(5) . . ? 
F233 C23' C243 112.6(5) . . ? 
F232 C23' C243 112.8(5) . . ? 
C23 C24 N2 109.2(5) . . ? 
C23 C24 C241 125.6(5) . . ? 
N2 C24 C241 125.2(5) . . ? 
F252 C25' F253 106.6(5) . . ? 
F252 C25' F251 106.6(5) . . ? 
F253 C25' F251 105.7(5) . . ? 
F252 C25' C245 114.1(5) . . ? 
F253 C25' C245 111.8(5) . . ? 
F251 C25' C245 111.5(5) . . ? 
C142 C141 C146 119.6(5) . . ? 
C142 C141 C14 120.4(5) . . ? 
C146 C141 C14 120.0(5) . . ? 
C141 C142 C143 120.6(6) . . ? 
C142 C143 C144 120.1(6) . . ? 
C142 C143 C13' 121.1(6) . . ? 
C144 C143 C13' 118.7(6) . . ? 
C145 C144 C143 119.6(6) . . ? 
C144 C145 C146 120.3(6) . . ? 
C144 C145 C15' 121.4(6) . . ? 
C146 C145 C15' 118.3(6) . . ? 
C141 C146 C145 119.8(6) . . ? 
C246 C241 C242 117.4(5) . . ? 
C246 C241 C24 123.4(5) . . ? 
C242 C241 C24 119.1(5) . . ? 
C243 C242 C241 121.5(5) . . ? 
C242 C243 C244 120.6(5) . . ? 
C242 C243 C23' 119.4(5) . . ? 
C244 C243 C23' 119.9(5) . . ? 
C245 C244 C243 118.5(5) . . ? 
C246 C245 C244 121.1(5) . . ? 
C246 C245 C25' 120.8(5) . . ? 
C244 C245 C25' 118.1(5) . . ? 
C245 C246 C241 120.9(5) . . ? 
  
_diffrn_measured_fraction_theta_max    0.981 
_diffrn_reflns_theta_full              23.46 
_diffrn_measured_fraction_theta_full   0.981 
_refine_diff_density_max    0.795 
_refine_diff_density_min   -0.575 
_refine_diff_density_rms    0.086 
  
#===END


data_05023t 
  
_audit_creation_method            SHELXL-97 
_chemical_name_systematic 
; 
 ? 
; 
_chemical_name_common             ? 
_chemical_melting_point           ? 
_chemical_formula_moiety          ? 
_chemical_formula_sum 
 'C30 H40 N4 Ti' 
_chemical_formula_weight          504.56 
  
loop_ 
 _atom_type_symbol 
 _atom_type_description 
 _atom_type_scat_dispersion_real 
 _atom_type_scat_dispersion_imag 
 _atom_type_scat_source 
 'C'  'C'   0.0033   0.0016 
 'International Tables Vol C Tables 4.2.6.8 and 6.1.1.4' 
 'H'  'H'   0.0000   0.0000 
 'International Tables Vol C Tables 4.2.6.8 and 6.1.1.4' 
 'N'  'N'   0.0061   0.0033 
 'International Tables Vol C Tables 4.2.6.8 and 6.1.1.4' 
 'Ti'  'Ti'   0.2776   0.4457 
 'International Tables Vol C Tables 4.2.6.8 and 6.1.1.4' 
  
_symmetry_cell_setting            Triclinic 
_symmetry_space_group_name_H-M    P-1 
  
loop_ 
 _symmetry_equiv_pos_as_xyz 
 'x, y, z' 
 '-x, -y, -z' 
  
_cell_length_a                    7.7446(11) 
_cell_length_b                    12.2148(17) 
_cell_length_c                    16.177(2) 
_cell_angle_alpha                 74.266(3) 
_cell_angle_beta                  82.985(3) 
_cell_angle_gamma                 72.952(3) 
_cell_volume                      1406.8(3) 
_cell_formula_units_Z             2 
_cell_measurement_temperature     173(2) 
_cell_measurement_reflns_used     ? 
_cell_measurement_theta_min       ? 
_cell_measurement_theta_max       ? 
  
_exptl_crystal_description        needle 
_exptl_crystal_colour             yellow 
_exptl_crystal_size_max           0.41 
_exptl_crystal_size_mid           0.30 
_exptl_crystal_size_min           0.22 
_exptl_crystal_density_meas       ? 
_exptl_crystal_density_diffrn     1.191 
_exptl_crystal_density_method     'not measured' 
_exptl_crystal_F_000              540 
_exptl_absorpt_coefficient_mu     0.328 
_exptl_absorpt_correction_type    empirical 
_exptl_absorpt_correction_T_min   0.7896 
_exptl_absorpt_correction_T_max   0.8593 
_exptl_absorpt_process_details    ? 
  
_exptl_special_details 
; 
 ? 
; 
  
_diffrn_ambient_temperature       173(2) 
_diffrn_radiation_wavelength      0.71073 
_diffrn_radiation_type            MoK\a 
_diffrn_radiation_source          'fine-focus sealed tube' 
_diffrn_radiation_monochromator   graphite 
_diffrn_measurement_device_type   'CCD area detector' 
_diffrn_measurement_method        'phi and omega scans' 
_diffrn_detector_area_resol_mean  ? 
_diffrn_standards_number          ? 
_diffrn_standards_interval_count  ? 
_diffrn_standards_interval_time   ? 
_diffrn_standards_decay_%         ? 
_diffrn_reflns_number             12039 
_diffrn_reflns_av_R_equivalents   0.0651 
_diffrn_reflns_av_sigmaI/netI     0.0841 
_diffrn_reflns_limit_h_min        -8 
_diffrn_reflns_limit_h_max        8 
_diffrn_reflns_limit_k_min        -13 
_diffrn_reflns_limit_k_max        13 
_diffrn_reflns_limit_l_min        -17 
_diffrn_reflns_limit_l_max        17 
_diffrn_reflns_theta_min          1.31 
_diffrn_reflns_theta_max          23.27 
_reflns_number_total              4051 
_reflns_number_gt                 2720 
_reflns_threshold_expression      >2sigma(I) 
  
_computing_data_collection        'Bruker SMART' 
_computing_cell_refinement        'Bruker SMART' 
_computing_data_reduction         'Bruker SHELXTL' 
_computing_structure_solution     'SHELXS-97 (Sheldrick, 1990)' 
_computing_structure_refinement   'SHELXL-97 (Sheldrick, 1997)' 
_computing_molecular_graphics     'Bruker SHELXTL' 
_computing_publication_material   'Bruker SHELXTL' 
  
_refine_special_details 
; 
 Refinement of F^2^ against ALL reflections.  The weighted R-factor wR and 
 goodness of fit S are based on F^2^, conventional R-factors R are based 
 on F, with F set to zero for negative F^2^. The threshold expression of 
 F^2^ > 2sigma(F^2^) is used only for calculating R-factors(gt) etc. and is 
 not relevant to the choice of reflections for refinement.  R-factors based 
 on F^2^ are statistically about twice as large as those based on F, and R- 
 factors based on ALL data will be even larger. 
; 
  
_refine_ls_structure_factor_coef  Fsqd 
_refine_ls_matrix_type            full 
_refine_ls_weighting_scheme       calc 
_refine_ls_weighting_details 
 'calc w=1/[\s^2^(Fo^2^)+(0.0893P)^2^+1.3989P] where P=(Fo^2^+2Fc^2^)/3' 
_atom_sites_solution_primary      direct 
_atom_sites_solution_secondary    difmap 
_atom_sites_solution_hydrogens    geom 
_refine_ls_hydrogen_treatment     mixed 
_refine_ls_extinction_method      SHELXL 
_refine_ls_extinction_coef        0.0029(17) 
_refine_ls_extinction_expression 
 'Fc^*^=kFc[1+0.001xFc^2^\l^3^/sin(2\q)]^-1/4^' 
_refine_ls_number_reflns          4051 
_refine_ls_number_parameters      317 
_refine_ls_number_restraints      0 
_refine_ls_R_factor_all           0.0989 
_refine_ls_R_factor_gt            0.0632 
_refine_ls_wR_factor_ref          0.1880 
_refine_ls_wR_factor_gt           0.1690 
_refine_ls_goodness_of_fit_ref    1.056 
_refine_ls_restrained_S_all       1.056 
_refine_ls_shift/su_max           0.000 
_refine_ls_shift/su_mean          0.000 
  
loop_ 
 _atom_site_label 
 _atom_site_type_symbol 
 _atom_site_fract_x 
 _atom_site_fract_y 
 _atom_site_fract_z 
 _atom_site_U_iso_or_equiv 
 _atom_site_adp_type 
 _atom_site_occupancy 
 _atom_site_symmetry_multiplicity 
 _atom_site_calc_flag 
 _atom_site_refinement_flags 
 _atom_site_disorder_assembly 
 _atom_site_disorder_group 
Ti Ti 0.69254(11) 0.57499(7) 0.74685(6) 0.0260(3) Uani 1 1 d . . . 
N1 N 0.4895(5) 0.7222(3) 0.7122(3) 0.0309(10) Uani 1 1 d . . . 
N2 N 0.5776(5) 0.4442(3) 0.7792(3) 0.0286(10) Uani 1 1 d . . . 
N3 N 0.8027(5) 0.5731(3) 0.8422(2) 0.0277(10) Uani 1 1 d . . . 
N4 N 0.8676(5) 0.5479(3) 0.6593(2) 0.0265(10) Uani 1 1 d . . . 
C11 C 0.3567(7) 0.7175(5) 0.6628(3) 0.0363(13) Uani 1 1 d . . . 
H11A H 0.3714 0.6611 0.6318 0.044 Uiso 1 1 calc R . . 
C12 C 0.2062(7) 0.8045(5) 0.6661(3) 0.0419(14) Uani 1 1 d . . . 
H12A H 0.1002 0.8197 0.6384 0.050 Uiso 1 1 calc R . . 
C13 C 0.2392(7) 0.8691(5) 0.7199(4) 0.0400(14) Uani 1 1 d . . . 
H13A H 0.1576 0.9347 0.7344 0.048 Uiso 1 1 calc R . . 
C14 C 0.4099(6) 0.8193(4) 0.7469(3) 0.0289(12) Uani 1 1 d . . . 
C14C C 0.3614(7) 0.7626(5) 0.9359(3) 0.0435(15) Uani 1 1 d . . . 
H14B H 0.3043 0.7416 0.8953 0.065 Uiso 1 1 calc R . . 
H14C H 0.2710 0.8092 0.9679 0.065 Uiso 1 1 calc R . . 
H14D H 0.4272 0.6920 0.9746 0.065 Uiso 1 1 calc R . . 
C14A C 0.6597(8) 0.9575(5) 0.6605(3) 0.0469(15) Uani 1 1 d . . . 
H14E H 0.5860 0.9244 0.6361 0.070 Uiso 1 1 calc R . . 
H14F H 0.7846 0.9259 0.6449 0.070 Uiso 1 1 calc R . . 
H14G H 0.6261 1.0419 0.6388 0.070 Uiso 1 1 calc R . . 
C14B C 0.8184(8) 0.9779(5) 0.9470(4) 0.0578(18) Uani 1 1 d . . . 
H14I H 0.7888 0.9512 1.0072 0.087 Uiso 1 1 calc R . . 
H14J H 0.7911 1.0625 0.9313 0.087 Uiso 1 1 calc R . . 
H14K H 0.9449 0.9447 0.9357 0.087 Uiso 1 1 calc R . . 
C21 C 0.4277(6) 0.4592(4) 0.8360(3) 0.0320(13) Uani 1 1 d . . . 
H21A H 0.3768 0.5270 0.8558 0.038 Uiso 1 1 calc R . . 
C22 C 0.3660(6) 0.3622(4) 0.8586(3) 0.0333(13) Uani 1 1 d . . . 
H22A H 0.2673 0.3511 0.8955 0.040 Uiso 1 1 calc R . . 
C23 C 0.4817(7) 0.2808(4) 0.8148(3) 0.0340(13) Uani 1 1 d . . . 
H23A H 0.4724 0.2055 0.8180 0.041 Uiso 1 1 calc R . . 
C24 C 0.6081(6) 0.3307(4) 0.7674(3) 0.0260(11) Uani 1 1 d . . . 
C24A C 0.9878(7) 0.2513(5) 0.8181(3) 0.0370(13) Uani 1 1 d . . . 
H24A H 1.1162 0.2207 0.8233 0.056 Uiso 1 1 calc R . . 
H24B H 0.9275 0.2061 0.8642 0.056 Uiso 1 1 calc R . . 
H24C H 0.9513 0.3325 0.8207 0.056 Uiso 1 1 calc R . . 
C24C C 0.5249(7) 0.3151(6) 0.6001(4) 0.0515(16) Uani 1 1 d . . . 
H24F H 0.5247 0.3014 0.5444 0.077 Uiso 1 1 calc R . . 
H24G H 0.4787 0.3981 0.5966 0.077 Uiso 1 1 calc R . . 
H24H H 0.4500 0.2730 0.6400 0.077 Uiso 1 1 calc R . . 
C24B C 1.1802(8) 0.1296(5) 0.5404(4) 0.0502(16) Uani 1 1 d . . . 
H24I H 1.1287 0.1298 0.4893 0.075 Uiso 1 1 calc R . . 
H24J H 1.2381 0.0497 0.5696 0.075 Uiso 1 1 calc R . . 
H24K H 1.2677 0.1743 0.5252 0.075 Uiso 1 1 calc R . . 
C31 C 0.7955(8) 0.5036(5) 0.9306(3) 0.0478(15) Uani 1 1 d . . . 
H31A H 0.8689 0.5239 0.9647 0.072 Uiso 1 1 calc R . . 
H31B H 0.8401 0.4210 0.9321 0.072 Uiso 1 1 calc R . . 
H31C H 0.6727 0.5201 0.9533 0.072 Uiso 1 1 calc R . . 
C32 C 0.9212(7) 0.6507(4) 0.8293(4) 0.0383(14) Uani 1 1 d . . . 
H32A H 0.9707 0.6422 0.8830 0.058 Uiso 1 1 calc R . . 
H32B H 0.8530 0.7312 0.8081 0.058 Uiso 1 1 calc R . . 
H32C H 1.0177 0.6296 0.7884 0.058 Uiso 1 1 calc R . . 
C41 C 1.0634(6) 0.5212(5) 0.6543(4) 0.0403(14) Uani 1 1 d . . . 
H41A H 1.1082 0.5124 0.5978 0.060 Uiso 1 1 calc R . . 
H41B H 1.1127 0.4491 0.6961 0.060 Uiso 1 1 calc R . . 
H41C H 1.0987 0.5846 0.6657 0.060 Uiso 1 1 calc R . . 
C42 C 0.7982(7) 0.5512(5) 0.5786(3) 0.0399(14) Uani 1 1 d . . . 
H42A H 0.8971 0.5363 0.5375 0.060 Uiso 1 1 calc R . . 
H42B H 0.7173 0.6277 0.5570 0.060 Uiso 1 1 calc R . . 
H42C H 0.7347 0.4919 0.5882 0.060 Uiso 1 1 calc R . . 
C141 C 0.5127(6) 0.8594(4) 0.7986(3) 0.0282(12) Uani 1 1 d . . . 
C142 C 0.6321(6) 0.9267(4) 0.7572(3) 0.0312(12) Uani 1 1 d . . . 
C143 C 0.7264(7) 0.9653(4) 0.8066(4) 0.0366(13) Uani 1 1 d . . . 
H14H H 0.8041 1.0107 0.7790 0.044 Uiso 1 1 calc R . . 
C144 C 0.7082(7) 0.9384(4) 0.8947(4) 0.0385(14) Uani 1 1 d . . . 
C145 C 0.5893(7) 0.8737(4) 0.9344(3) 0.0375(13) Uani 1 1 d . . . 
H14A H 0.5741 0.8563 0.9940 0.045 Uiso 1 1 calc R . . 
C146 C 0.4907(7) 0.8334(4) 0.8883(3) 0.0316(12) Uani 1 1 d . . . 
C241 C 0.7562(6) 0.2822(4) 0.7093(3) 0.0241(11) Uani 1 1 d . . . 
C242 C 0.9383(7) 0.2428(4) 0.7333(3) 0.0295(12) Uani 1 1 d . . . 
C243 C 1.0708(7) 0.1949(4) 0.6770(3) 0.0333(13) Uani 1 1 d . . . 
H24D H 1.1905 0.1688 0.6926 0.040 Uiso 1 1 calc R . . 
C244 C 1.0326(7) 0.1845(4) 0.5988(3) 0.0343(13) Uani 1 1 d . . . 
C245 C 0.8546(7) 0.2230(4) 0.5767(3) 0.0362(13) Uani 1 1 d . . . 
H24E H 0.8265 0.2159 0.5244 0.043 Uiso 1 1 calc R . . 
C246 C 0.7152(6) 0.2722(4) 0.6301(3) 0.0303(12) Uani 1 1 d . . . 
  
loop_ 
 _atom_site_aniso_label 
 _atom_site_aniso_U_11 
 _atom_site_aniso_U_22 
 _atom_site_aniso_U_33 
 _atom_site_aniso_U_23 
 _atom_site_aniso_U_13 
 _atom_site_aniso_U_12 
Ti 0.0238(5) 0.0252(5) 0.0311(6) -0.0105(4) -0.0015(4) -0.0067(4) 
N1 0.029(2) 0.028(2) 0.039(3) -0.014(2) -0.008(2) -0.0046(19) 
N2 0.024(2) 0.027(2) 0.038(3) -0.016(2) 0.0020(19) -0.0068(18) 
N3 0.029(2) 0.027(2) 0.029(2) -0.0097(19) -0.0007(19) -0.0092(19) 
N4 0.024(2) 0.024(2) 0.033(2) -0.0110(19) 0.0002(19) -0.0059(18) 
C11 0.037(3) 0.036(3) 0.041(3) -0.017(3) -0.006(3) -0.008(3) 
C12 0.033(3) 0.047(4) 0.044(4) -0.007(3) -0.013(3) -0.007(3) 
C13 0.029(3) 0.032(3) 0.055(4) -0.015(3) -0.006(3) 0.003(2) 
C14 0.031(3) 0.022(3) 0.035(3) -0.008(2) -0.002(2) -0.008(2) 
C14C 0.051(4) 0.039(3) 0.044(4) -0.013(3) 0.005(3) -0.019(3) 
C14A 0.049(4) 0.049(4) 0.044(4) -0.010(3) 0.006(3) -0.019(3) 
C14B 0.060(4) 0.059(4) 0.068(5) -0.033(4) -0.007(3) -0.020(3) 
C21 0.025(3) 0.039(3) 0.038(3) -0.023(3) 0.004(2) -0.007(2) 
C22 0.026(3) 0.042(3) 0.037(3) -0.014(3) 0.007(2) -0.016(3) 
C23 0.036(3) 0.031(3) 0.041(3) -0.012(3) 0.001(3) -0.017(3) 
C24 0.023(3) 0.028(3) 0.028(3) -0.008(2) -0.004(2) -0.005(2) 
C24A 0.036(3) 0.040(3) 0.036(3) -0.009(3) -0.010(3) -0.009(3) 
C24C 0.043(4) 0.073(4) 0.043(4) -0.023(3) -0.009(3) -0.011(3) 
C24B 0.049(4) 0.052(4) 0.044(4) -0.017(3) 0.011(3) -0.005(3) 
C31 0.058(4) 0.053(4) 0.036(3) -0.012(3) -0.002(3) -0.020(3) 
C32 0.029(3) 0.032(3) 0.056(4) -0.015(3) -0.006(3) -0.007(2) 
C41 0.030(3) 0.048(4) 0.047(4) -0.020(3) 0.001(3) -0.010(3) 
C42 0.040(3) 0.044(3) 0.036(3) -0.010(3) 0.001(3) -0.012(3) 
C141 0.029(3) 0.017(3) 0.037(3) -0.009(2) 0.000(2) -0.001(2) 
C142 0.028(3) 0.025(3) 0.041(3) -0.012(2) 0.001(2) -0.005(2) 
C143 0.034(3) 0.026(3) 0.052(4) -0.012(3) 0.003(3) -0.010(2) 
C144 0.043(3) 0.027(3) 0.052(4) -0.019(3) -0.010(3) -0.008(3) 
C145 0.043(3) 0.038(3) 0.034(3) -0.016(3) 0.002(3) -0.009(3) 
C146 0.034(3) 0.025(3) 0.038(3) -0.012(2) 0.004(3) -0.009(2) 
C241 0.028(3) 0.017(3) 0.027(3) -0.004(2) -0.002(2) -0.007(2) 
C242 0.034(3) 0.026(3) 0.031(3) -0.006(2) 0.000(2) -0.013(2) 
C243 0.023(3) 0.029(3) 0.045(3) -0.010(3) -0.003(3) -0.002(2) 
C244 0.036(3) 0.026(3) 0.039(3) -0.011(2) 0.006(3) -0.005(2) 
C245 0.048(4) 0.033(3) 0.029(3) -0.011(2) -0.005(3) -0.009(3) 
C246 0.029(3) 0.028(3) 0.034(3) -0.009(2) -0.002(2) -0.006(2) 
  
_geom_special_details 
; 
 All esds (except the esd in the dihedral angle between two l.s. planes) 
 are estimated using the full covariance matrix.  The cell esds are taken 
 into account individually in the estimation of esds in distances, angles 
 and torsion angles; correlations between esds in cell parameters are only 
 used when they are defined by crystal symmetry.  An approximate (isotropic) 
 treatment of cell esds is used for estimating esds involving l.s. planes. 
; 
  
loop_ 
 _geom_bond_atom_site_label_1 
 _geom_bond_atom_site_label_2 
 _geom_bond_distance 
 _geom_bond_site_symmetry_2 
 _geom_bond_publ_flag 
Ti N3 1.844(4) . ? 
Ti N4 1.865(4) . ? 
Ti N2 1.971(4) . ? 
Ti N1 2.007(4) . ? 
N1 C14 1.397(6) . ? 
N1 C11 1.399(6) . ? 
N2 C21 1.391(6) . ? 
N2 C24 1.398(6) . ? 
N3 C31 1.456(6) . ? 
N3 C32 1.462(6) . ? 
N4 C41 1.451(6) . ? 
N4 C42 1.457(6) . ? 
C11 C12 1.335(7) . ? 
C12 C13 1.410(7) . ? 
C13 C14 1.355(7) . ? 
C14 C141 1.479(7) . ? 
C14C C146 1.517(7) . ? 
C14A C142 1.510(7) . ? 
C14B C144 1.522(7) . ? 
C21 C22 1.350(7) . ? 
C22 C23 1.413(7) . ? 
C23 C24 1.354(7) . ? 
C24 C241 1.480(6) . ? 
C24A C242 1.505(6) . ? 
C24C C246 1.506(7) . ? 
C24B C244 1.510(7) . ? 
C141 C146 1.399(7) . ? 
C141 C142 1.405(7) . ? 
C142 C143 1.395(7) . ? 
C143 C144 1.372(7) . ? 
C144 C145 1.375(7) . ? 
C145 C146 1.394(7) . ? 
C241 C246 1.401(6) . ? 
C241 C242 1.416(6) . ? 
C242 C243 1.392(7) . ? 
C243 C244 1.379(7) . ? 
C244 C245 1.378(7) . ? 
C245 C246 1.396(7) . ? 
  
loop_ 
 _geom_angle_atom_site_label_1 
 _geom_angle_atom_site_label_2 
 _geom_angle_atom_site_label_3 
 _geom_angle 
 _geom_angle_site_symmetry_1 
 _geom_angle_site_symmetry_3 
 _geom_angle_publ_flag 
N3 Ti N4 109.27(17) . . ? 
N3 Ti N2 107.54(17) . . ? 
N4 Ti N2 108.38(16) . . ? 
N3 Ti N1 112.02(16) . . ? 
N4 Ti N1 114.06(17) . . ? 
N2 Ti N1 105.24(16) . . ? 
C14 N1 C11 105.0(4) . . ? 
C14 N1 Ti 133.9(3) . . ? 
C11 N1 Ti 117.3(3) . . ? 
C21 N2 C24 105.5(4) . . ? 
C21 N2 Ti 115.3(3) . . ? 
C24 N2 Ti 138.9(3) . . ? 
C31 N3 C32 112.7(4) . . ? 
C31 N3 Ti 130.4(3) . . ? 
C32 N3 Ti 116.9(3) . . ? 
C41 N4 C42 111.5(4) . . ? 
C41 N4 Ti 133.3(3) . . ? 
C42 N4 Ti 115.1(3) . . ? 
C12 C11 N1 111.0(5) . . ? 
C11 C12 C13 106.6(5) . . ? 
C14 C13 C12 108.4(5) . . ? 
C13 C14 N1 109.0(4) . . ? 
C13 C14 C141 129.1(5) . . ? 
N1 C14 C141 121.7(4) . . ? 
C22 C21 N2 110.9(4) . . ? 
C21 C22 C23 106.1(4) . . ? 
C24 C23 C22 108.6(4) . . ? 
C23 C24 N2 108.8(4) . . ? 
C23 C24 C241 129.2(4) . . ? 
N2 C24 C241 122.0(4) . . ? 
C146 C141 C142 119.2(5) . . ? 
C146 C141 C14 121.1(4) . . ? 
C142 C141 C14 119.7(4) . . ? 
C143 C142 C141 119.1(5) . . ? 
C143 C142 C14A 119.7(5) . . ? 
C141 C142 C14A 121.2(5) . . ? 
C144 C143 C142 122.1(5) . . ? 
C143 C144 C145 118.2(5) . . ? 
C143 C144 C14B 120.9(5) . . ? 
C145 C144 C14B 121.0(5) . . ? 
C144 C145 C146 122.2(5) . . ? 
C145 C146 C141 119.1(5) . . ? 
C145 C146 C14C 119.6(5) . . ? 
C141 C146 C14C 121.2(4) . . ? 
C246 C241 C242 119.4(4) . . ? 
C246 C241 C24 119.5(4) . . ? 
C242 C241 C24 121.1(4) . . ? 
C243 C242 C241 118.4(4) . . ? 
C243 C242 C24A 120.6(4) . . ? 
C241 C242 C24A 121.0(4) . . ? 
C244 C243 C242 122.9(5) . . ? 
C245 C244 C243 117.9(5) . . ? 
C245 C244 C24B 121.0(5) . . ? 
C243 C244 C24B 121.1(5) . . ? 
C244 C245 C246 122.2(5) . . ? 
C245 C246 C241 119.3(4) . . ? 
C245 C246 C24C 118.8(5) . . ? 
C241 C246 C24C 121.9(4) . . ? 
  
_diffrn_measured_fraction_theta_max    1.000 
_diffrn_reflns_theta_full              23.27 
_diffrn_measured_fraction_theta_full   1.000 
_refine_diff_density_max    0.494 
_refine_diff_density_min   -0.480 
_refine_diff_density_rms    0.072 
  
